# Supplementary material for: An efficient route to xanthine based A2A adenosine receptor antagonists and functional derivatives
Source: Royal Society of Chemistry journal article supplement (doi:10.1039/c003382k), 2010-01-01

## Supporting Information

### An efficient Route to Novel A2a Adenosine Receptor Antagonists, Analogues and Prodrugs

Paul LaBeaume, Ma Dong, Mikhail Sitkovsky, Elizabeth V. Jones,  
Rhiannon Thomas, Sara Sadler, Amy E. Kallmerten, and Graham B. Jones \*

*Bioorganic and Medicinal Chemistry Laboratories, Departement of chemistry and  
Chemical Biology, Northeastern University, Boston MA, 02115. [Gr.jones@neu.edu](mailto:Gr.jones@neu.edu)*

#### Content:

|                                                 |     |
|-------------------------------------------------|-----|
| General Methods and Typical Reaction Procedures | S2  |
| Spectroscopic data of compounds                 | S11 |
| Spectra for compounds                           | S16 |

### General Methods.

All reactions were carried out under anhydrous, inert atmosphere (nitrogen or argon) with dry, freshly distilled solvents unless otherwise noted. Thin layer chromatography (TLC) was performed using silica gel 60 F254 precoated plates. Preparative thin layer chromatography was carried with Silica Gel GF. Flash chromatography was performed using silica gel 60 (230-400 Mesh). All chemicals were purchased from Sigma Aldrich or Fisher Scientific unless otherwise specified.

Nuclear magnetic resonance (NMR) spectra for all compounds were obtained either on a 300 or a 500 MHz spectrometer. The chemical shifts are reported in  $\delta$  (ppm) values relative to  $\text{CHCl}_3$  ( $\delta$  7.27 for  $^1\text{H}$  NMR and  $\delta$  77.0 ppm for  $^{13}\text{C}$  NMR), multiplicities are indicated by s (singlet), d (doublet), t (triplet), q (quartet), p (pentet), h (hextet), m (multiplet) and br (broad). Coupling constants,  $J$ , are reported in Hertz (Hz).

Mass spectra for all compounds were obtained on a Hewlett Packard 6890 Plus GC with 5973 Mass Selective Detector. The column used was an Agilent HP Ultra 1, 25m x 0.2mm with a 0.11 $\mu\text{m}$  film thickness. The electron impact ionization source was run at 70 eV. For compounds containing atoms with characteristic isotopes (i.e. bromine) low resolution mass spectrometry was used to verify presence of isotopes and verify compound identity.

### Procedure 1: synthesis of Bromodimethylsulfonium Bromide (BDMS):

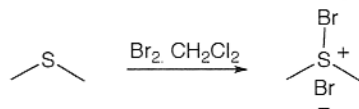

Dimethyl sulfide (1.5 g, 25 mmol) was dissolved in freshly distilled dichloromethane (5 mL). A solution of bromine (1.997 g, 25 mmol) in dichloromethane (5 mL) and added into the above solution at  $0^\circ\text{C}$  over 5 min. The orange precipitate was collected by vacuum filtration washed with hexane and dried *in vacuo* to yield the title compound (4.3 g, 77%) as a yellow solid. mp  $80\text{--}83^\circ\text{C}$ .<sup>1</sup>

<sup>1</sup> Khan, A.T., Ali, M.A. Goswami, P., Choudhury L.H., *J. Org. Chem.* **2006**, *71*, 8961.

**Procedure 2: synthesis of xanthines, 1,3-diethyl-8-phenyl-1*H*-purine-2,6(3*H*,7*H*)-dione :**

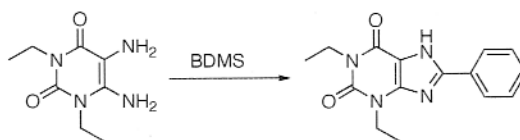

Bromodimethylsulfonium bromide (0.25 mmol) from the previous procedure was added to a solution of benzaldehyde (0.053 g, 0.25 mmol) and 1, 3-diethyl-5,6-aminouracil (**1**) (0.025 g, 0.25 mmol) in freshly distilled acetonitrile (5 mL). The reaction mixture was stirred at 25°C for 4h. The precipitate was collected via filtration, washed with ethyl acetate (25 mL) and dried *in vacuo*. The crude solid was purified by recrystallization from DMSO and water to yield the title compound (0.050 g, 70%) as a white solid. mp > 300 °C ; <sup>1</sup>H NMR (500 MHz, DMSO-*d*<sub>6</sub>): δ 1.16 (t, *J* = 7.0Hz, 3H), 1.26 (t, *J* = 7.0Hz, 3H), 3.97 (q, *J* = 7.0Hz, 2H), 4.10 (q, *J* = 7.0Hz, 2H), 7.44-56 (m, 3H), 8.14 (d, *J* = 8.5Hz, 2H), 13.90 (br, 1H). HRMS (ESI), C<sub>15</sub>H<sub>17</sub>N<sub>4</sub>O<sub>2</sub> *m/z* (*M*+*H*)<sup>+</sup>: calcd 284.1273, obsd 284.1277

**Procedure 3: microwave accelerated coupling of xanthines: 8-(4-bromophenyl)-1,3-diethyl-1*H*-purine-2,6(3*H*,7*H*)-dione:**

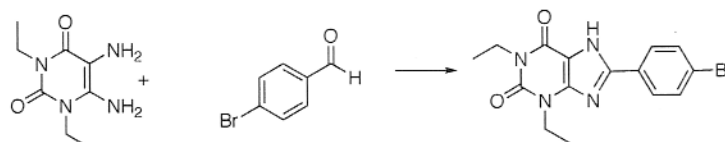

(Bromodimethyl) sulfonium bromide (0.010 g, 0.045 mmol) was added to a mixture of 4-bromobenzaldehyde (0.0466 g, 0.25 mmol), 1,3-diethyl-5,6-diaminouracil (0.4955 g, 0.25 mol) and anhydrous acetonitrile (500 μL) in a 14 x 86 mm (o.d.) glass microwave tube. The tube was capped with a CEM Corp. PL cap, the atmosphere was flushed with argon gas and then the tube was placed in the cavity of a CEM discover® Lab Mate reactor. The solution was subjected to microwave irradiation while stirring, the temperature was brought to 110 °C over 15 min. and then held for 10 min (150 W, 100 psi). The resulting precipitate was filtered, washed with ethyl acetate (5 mL) and methanol (2.5 mL) and then recrystallized from ethyl acetate to yield the title compound (0.065g, 72%) as a yellow solid. mp > 300 °C ; <sup>1</sup>H NMR (500 MHz, DMSO-*d*<sub>6</sub>): δ 1.13 (t, *J* = 7.0Hz, 3H), 1.26 (t, *J* = 7.0Hz, 3H), 3.94 (q, *J* = 7.0Hz, 2H), 4.08 (q, *J* = 7.0Hz, 2H), 7.01 (d, *J* = 8.5Hz, 2H), 8.05 (d, *J* = 8.5Hz, 2H), 13.89 (br, 1H). HRMS (ESI), C<sub>15</sub>H<sub>16</sub>BrN<sub>4</sub>O<sub>2</sub> *m/z* (*M*+*H*)<sup>+</sup>: calcd 362.0378, obsd 362.0369.

**Procedure 4 : 8-(5-bromo-2-hydroxyphenyl)1,3-diethyl-1*H*-purine-2,6(3*H*,7*H*)-dione :**

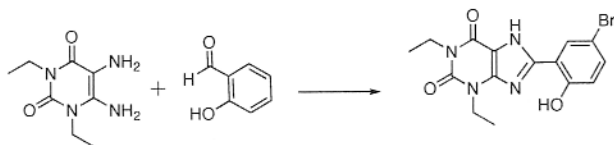

(Bromodimethyl) sulfonium bromide (0.879 g, 4.0 mmol) was added (in two portions) to a mixture of 2-hydroxybenzaldehyde (0.3053 g, 2.5 mmol) and 1,3,-diethyl-5,6-diaminouracil (0.495 g 2.5 mmol) in acetonitrile (5 mL). The reaction mixture was stirred at room temperature for 14 hours. The precipitate formed was collected by vacuum filtration, washed with ethyl acetate and dried *in vacuo*. The crude solid was purified by recrystallization from DMSO and water to yield the title compound (0.66 g, 73%) as a white solid. mp 315-317 °C; TLC (dichloromethane/ methanol = 19:1):  $R_f$  0.30;  $^1\text{H}$  NMR (500 MHz,  $\text{d}_6$ -DMSO):  $\delta$  13.80-14.20 (brs, 1H), 11.75-12.10 (brs, 1H), 8.29 (d,  $J$  = 2.5 Hz, 1H), 7.80 (dd,  $J$  = 8.5, 2.5 Hz, 1H), 6.97 (d,  $J$  = 8.5 Hz, 1H), 4.08 (q,  $J$  = 7.5 Hz, 2H), 3.96 (q,  $J$  = 7.5 Hz, 2H), 1.28 (q,  $J$  = 7.5 Hz, 3H), 1.15 (q,  $J$  = 7.5 Hz, 3H);  $^{13}\text{C}$  NMR (125 MHz,  $\text{d}_6$ -DMSO):  $\delta$  156.6, 154.4, 150.7, 150.6, 148.1, 135.1, 129.7, 120.2, 118.0, 115.3, 111.3, 55.6, 39.2, 36.7, 13.9; HRMS (ESI)  $m/z$   $\text{C}_{15}\text{H}_{16}\text{BrN}_4\text{O}_3$  ( $\text{M}+\text{H}$ ) $^+$ : calcd 379.0406, obsd 379.0401.

**Procedure 5: (E)-3,4-Dimethoxy-cinnamaldehyde:**

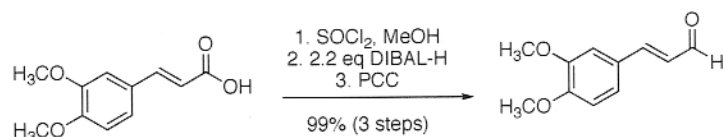

3,4-Dimethoxycinnamic acid (2.96 g, 11.7 mmol) was dissolved in methanol (60 mL). Thionyl Chloride (0.893 mL, 1.05 eq) added dropwise. Mixture refluxed for 30 minutes. triethylamine (1.7 mL) was added to neutralize the evolved hydrochloric acid and the reaction was allowed to reflux for an additional 30 minutes. The solution was then cooled and the solvent was removed *in vacuo*. Purification via flash chromatography provided 3.06 g (98%) of 3,4-Dimethoxy-methylcinnimate as a yellow solid.

3,4-Dimethoxy-methylcinnimate (3.0g , 11.23 mmol) dissolved in dichloromethane (180 mL). The reaction mixture was cooled to  $-78^\circ\text{C}$  and Diisobutyl aluminum hydride (28 mL, 1M in Hex, 2.5 eq) was added over one hour. Quenched was performed utilizing 1.2 mL of methanol then 1 mL of water at  $-60^\circ\text{C}$ . The precipitated salts collected, then dissolved in 1% Hydrochloric acid. This solution was extracted with dichloromethane (4 x 200 mL). The organic layers collected from the salt solution washings and the original solution were combined, washed with water (100 mL) and brine (100 mL) and then concentrated *in vacuo* to be used directly in the next step without further purification.  $^1\text{H}$  NMR (500 MHz,  $\text{CDCl}_3$ ): 2.2 (s, broad, 1H) 3.99 (s., 3H), 4.0 (s, 3H), 4.38 (d,  $J = 8.0\text{Hz}$ , 2H) 6.25 (dt,  $J = 8.0, 2.0\text{Hz}$ , 1H) 6.9 (s, 1H), 7.2 (d,  $J = 8.0\text{Hz}$  1H) 7.47 (s, 1H);

The crude reaction mixture was dissolved in dichloromethane (110 mL). The resulting solution was added dropwise to a solution of pyridinium chlorochromate (2.5231 g) in dichloromethane (170 mL). The mixture was stirred overnight (12 h). An additional 20 mol % of PCC was added to the solution and the solution was allowed to stir an additional hour. The solution was filtered through a plug of florisil, concentrated *in vacuo* and purified via flash chromatography to provide 2.037 g (73.4%) of the title compound as a yellow solid as compared to literature characterisation. m.p.  $82-83^\circ\text{C}$   $^1\text{H}$  NMR (300 MHz,  $\text{CDCl}_3$ ,) 9.67 (d,  $J = 7.8\text{ Hz}$ , CHO), 7.42 (d,  $J = 15.8\text{ Hz}$ , 1 H), 7.17-6.91 (m, 3 H) 6.62 (dd,  $J = 15.8, 7.7\text{ Hz}$ , 1H) 3.94-3.93 (s, 6 H);  $^{13}\text{C}$  (75 MHz,  $\text{CDCl}_3$ ,) 193.6, 152.8, 152.5 127.1, 126.7, 123.4, 111.1, 110.1, 109.0, 56.0, 55.9.<sup>2</sup>

<sup>2</sup> J. Org. Chem, 1990 55 , 3679

**Procedure 6: (E)-1,3-diethyl-8-(4-hydroxystyryl)-7-methyl-1H-purine-2,6(3H,7H)-dione:**

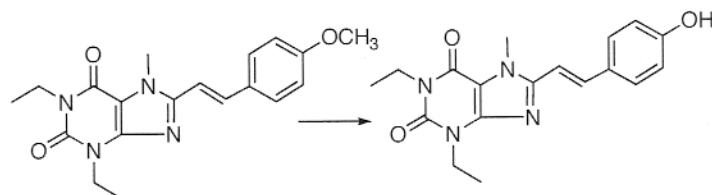

A 1M BBr<sub>3</sub> in CH<sub>2</sub>Cl<sub>2</sub> (170 µl, 0.85 mmol) was added to a solution of (E)-1,3-diethyl-8-(4-methoxystyryl)-7-methyl-1H-purine-2,6(3H,7H)-dione<sup>3</sup> (100 mg, 0.28 mmol) in dry CH<sub>2</sub>Cl<sub>2</sub> (0.35 mL). The reaction mixture was stirred at room temperature for 3 h and diluted with water (0.3 mL). The formed precipitate collected via vacuum filtration, washed with excess water and dried *in vacuo* to give the title compound as a yellow solid. (90 mg, 95%) mp > 300 °C; TLC (MeOH: CH<sub>2</sub>Cl<sub>2</sub> = 1: 9): R<sub>f</sub> 0.2 <sup>1</sup>H NMR (500 MHz, DMSO-d<sub>6</sub>): δ 1.12 (t, *J* = 7.5 Hz, 3H), 1.25 (t, *J* = 7.5 Hz, 3H), 3.91 (q, *J* = 7.5 Hz, 2H), 3.99 (s, 3H), 4.06 (q, *J* = 7.5 Hz, 2H), 6.80 (d, *J* = 9.0 Hz, 2H), 7.11 (d, *J* = 16.0 Hz, 1H), 7.58 (d, *J* = 16.0 Hz, 1H), 7.62 (d, *J* = 9.0 Hz, 2H). <sup>13</sup>C NMR (75 MHz, DMSO-d<sub>6</sub>): δ 51.1, 69.2, 73.3, 75.6, 144.9, 147.1, 153.6, 164.6, 167.3, 174.8, 185.4, 187.9, 188.3, 191.8, 196.7 HRMS (ESI), *m/z* C<sub>18</sub>H<sub>21</sub>N<sub>4</sub>O<sub>3</sub> (M+H)<sup>+</sup>: calcd 340.1535, obsd 340.1549

<sup>3</sup> Synthesized according to EP 0590919.

**Procedure 7: (E)-tert-butyl 1-(7-amino-5-(2-(4-(2-1,3 diethyl-2,6-dioxo-2,3,6,7-tetrahydro-1H-purin-8-yl)vinyl)phenoxyamino)propanamido)-3,4,7-trioxoheptan-2-ylamino)-1-oxopropan-2-ylcarbamate (24)**

(*N*-(*N*-(*N*-(*N*-(1,1-dimethylethoxycarbonyl)alanyl)asparaginy)alanine *E*-4-(2-(1,3-diethyl-2,6-dioxo-7-methyl-purin-8-yl)ethenyl)phenyl ester)

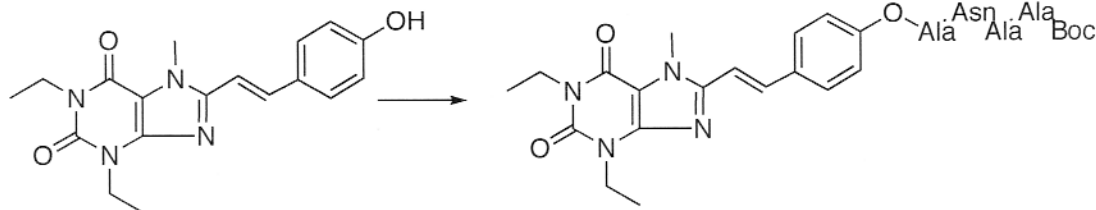

4-Dimethylaminopyridine (DMAP) (11 mg, 0.088 mmol) was added to a flask containing compound (**22**) (30 mg, 0.088 mmol) in DMF (1.2 mL). The solution was stirred at 25°C for 30 min. The resulting compound (41mg, 0.088mmol) was added to a solution of Boc-Ala-Ala-Asp-Ala<sup>4</sup> (**23**) (41mg, 0.088 mmol) in *N*-methyl morpholine (23μl, 0.211mmol) and O-(1H-benzotriazole-1-yl)-*N,N,N',N'*-tetramethyluronium hexafluorophosphate (HBTU) (59mg, 0.152mmol) in DMF (1.2 mL) at 0°C. The reaction mixture was stirred in the dark at 25°C for 6h. The reaction was concentrated *in vacuo*, diluted ethyl acetate (20 mL) and the resulting precipitate was collected via vacuum filtration. The filtrate was washed with ethyl acetate and dried *in vacuo* to yield the title compound (44 mg, 65%) as a pale yellow solid. m.p. 208-212°C TLC (MeOH: CH<sub>2</sub>Cl<sub>2</sub> = 1: 9): R<sub>f</sub> 0.41 <sup>1</sup>H NMR (500 MHz, DMSO-d<sub>6</sub>): δ 1.13 (t, *J* = 7.5Hz, 3H), 1.16-1.21 (m, 6H), 1.26 (t, *J* = 7.5 Hz, 3H), 1.37 (s, 9H), 1.44 (d, *J* = 6.0Hz, 3H), 2.50 (m, 2H), 3.93 (q, *J* = 6.0Hz, 2H), 3.98 (m, 1H), 4.04 (s, 3H), 4.07 (q, *J* = 6.0Hz, 2H), 4.21 (m, 1H), 4.40-4.45 (m, 1H), 4.57(m, 1H), 6.90-6.96 (m, 2H), 7.16 (d, *J* = 7.0Hz, 2H), 7.34 (s, 1H), 7.36 (d, *J* = 15.5Hz, 1H), 7.67 (d, *J* = 15.5Hz, 1H), 7.85 (d, *J* = 6.5Hz, 1H), 7.95-8.01 (m, 1H), 8.08-8.13(m, 1H), 8.25 (dd, *J* = 25.5, 6.5Hz, 1H) <sup>13</sup>C NMR (75 MHz, DMSO-d<sub>6</sub>): δ 14.2, 17.5, 18.9, 19.1, 36.5, 37.6, 38.7, 42.4, 42.7, 49.1, 50.2, 50.5, 79.0, 108.4, 114.0, 123.0, 129.7, 134.3, 136.5, 148.4, 150.6, 150.9, 152.0, 155.0, 156.0, 171.9, 172.1, 172.3, 172.9, 173.7. HRMS (ESI), *m/z* C<sub>36</sub>H<sub>50</sub>N<sub>9</sub>O<sub>10</sub> (M+H)<sup>+</sup>: calcd 767.3602, obsd 767.3612.

<sup>4</sup> Synthesized according to Rella, M. R., Williard, P. G. *J. Org. Chem.* **2007**, 72, 525.

**Procedure 8: 8-(3'-acetylphenyl-4-yl)-1,3-diethyl-1H-purine-2,6(3H,7H)-dione**

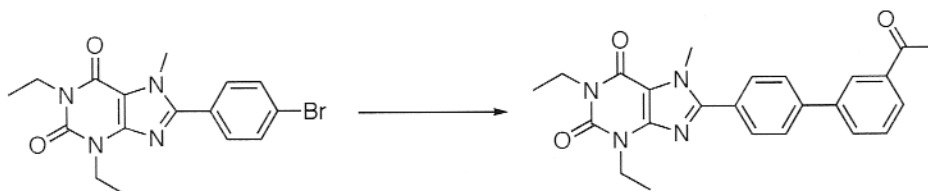

$\text{Pd}(\text{PPh}_3)_4$  (0.0017 g, 3mol%) was added to a degassed solution of 8-(4-bromophenyl)-1,3-diethyl-1H-purine-2,6(3H,7H)-dione (0.020 g, 0.053 mmol), 3-acetylphenylboronic acid (0.0095 g, 1.1 equiv) and barium hydroxide octahydrate (0.025 g, 1.5 equiv) in dimethoxyethane (DME) (2 mL) and water (0.5 mL) in a CEM microwave tube. The resulting solution was exposed to microwave irradiation (300W) for 10 minutes at 100 °C and cooled to 25 °C. The reaction mixture was diluted with dichloromethane (10 mL) and filtered through a plug of silica gel. The filtrate was diluted with water (10 mL) and extracted with dichloromethane (3x, 10 mL). The combined extracts were washed with brine (20 mL), dried with  $\text{MgSO}_4$  and concentrated in vacuo. The crude product was purified by preparative thin layer chromatography (hexanes/ ethyl acetate = 3:2) to afford the title compound (0.016 g, 73%) as a white solid. Mp = 182-184 °C; TLC (hexane/ ethyl acetate = 1:1):  $R_f$  0.36;  $^1\text{H}$  NMR (500 MHz,  $\text{CDCl}_3$ ):  $\delta$  8.22-8.25 (m, 1H), 7.97-8.01 (m, 1H), 7.76-7.87 (m, 5H), 7.60 (t,  $J$  = 7.5 Hz, 1H), 4.24 (q,  $J$  = 7.0Hz, 2H), 4.13 (q,  $J$  = 7.0Hz, 2H), 4.12 (s, 3H), 2.68 (s, 3H), 1.40 (t,  $J$  = 7.0Hz, 3H), 1.29 (t,  $J$  = 7.0Hz, 3H);  $^{13}\text{C}$  NMR (125 MHz,  $\text{CDCl}_3$ ):  $\delta$  198.90155.6, 151.7, 150.9, 148.1, 142.2, 140.6, 138.0, 131.8, 129.9, 129.5, 128.13, 128.09, 127.8, 127.0, 109.1, 77.4, 38.6, 36.5, 34.1, 26.9, 13.6, 13.5; HRMS (ESI)  $m/z$   $\text{C}_{24}\text{H}_{25}\text{N}_4\text{O}_3$  ( $\text{M}+\text{H}$ ) $^+$ : calcd 417.1927, obsd 417.1919.

**Procedure 9: 8-(5-bromo-2-methoxyphenyl)-1,3-diethyl-7-methyl-1H-purine-2,6(3H,7H)-dione**

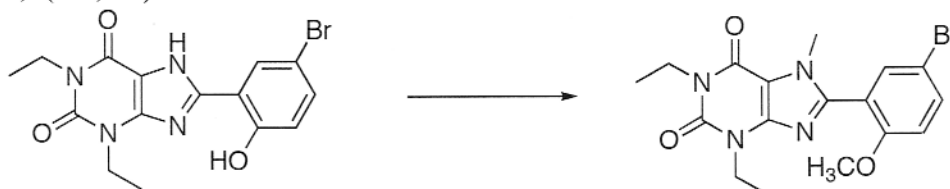

Methyl iodide (36.5  $\mu\text{L}$ , 3 equiv) was added to a mixture of 8-(5-bromo-2-hydroxyphenyl)-1,3-diethyl-1H-purine-2,6(3H,7H)-dione (0.074 g, 0.194 mmol) and potassium carbonate (0.085 g, 3 equiv) in dimethylformamide (4 mL) at 25 °C (Ar atmosphere) then heated to 60°C overnight. The resulting solution was diluted with water (20 mL) and acidified to pH ~2 by the slow addition of 5% HCl. The aqueous layer was extracted with chloroform (3x 20 mL), dried over  $\text{MgSO}_4$  and concentrated in vacuo to afford the title compound (0.065 g, 82%) as a yellow solid. Mp = 159-161 °C; TLC (Hexane/ ethyl acetate = 1:1):  $R_f$  0.28;  $^1\text{H}$  NMR (500 MHz,  $\text{CDCl}_3$ ):  $\delta$  7.57-7.63 (m, 2H), 6.92 (d,  $J$  = 8.5 Hz, 1H), 4.20 (q,  $J$  = 7.0 Hz, 2H), 4.11 (q,  $J$  = 7.0 Hz, 2H), 3.85 (s, 3H), 3.80 (s, 3H), 1.37 (t,  $J$  = 7.0 Hz, 3H), 1.28 (t,  $J$  = 7.0 Hz, 3H);  $^{13}\text{C}$  NMR (125 MHz,  $\text{CDCl}_3$ ):  $\delta$  156.6, 155.4, 150.8, 148.7, 147.8, 134.96, 134.76, 119.7, 113.4, 113.1, 108.8, 55.1, 38.6, 36.5, 33.3, 13.6, 13.4; HRMS (ESI)  $m/z$   $\text{C}_{17}\text{H}_{20}\text{BrN}_4\text{O}_3$  ( $\text{M}+\text{H}$ ) $^+$ : calcd 407.0719, obsd 407.0714.



**Procedure 10: 8-(5-bromo-2-hydroxyphenyl)-1,3-diethyl-7-methyl-1H-purine-2,6(3H,7H)-dione**

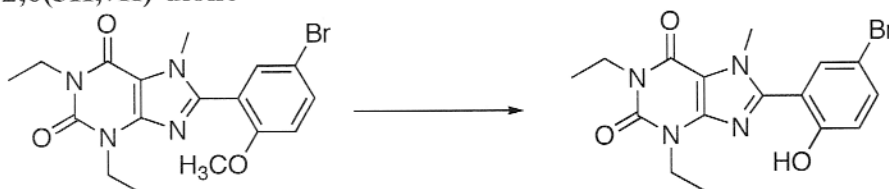

Boron tribromide (32  $\mu$ L, 3 equiv) was added to a solution of 8-(5-bromo-2-methoxyphenyl)-1,3-diethyl-7-methyl-1H-purine-2,6(3H,7H)-dione (0.046g, 0.113mmol) in dichloromethane (2 mL) at 25°C and stirred for 2h. The resulting solution was diluted with water (10 mL) and extracted with dichloromethane (3x 10mL). The combined extract were washed with brine (10 mL), dried with  $\text{MgSO}_4$ , and concentrated in vacuo to afford the title compound (0.0417g, 94%) as a yellow solid. Mp = 176-177 °C; TLC neutralized with triethylamine (ethyl acetate):  $R_f$  0.22;  $^1\text{H}$  NMR (500 MHz,  $\text{CDCl}_3$ ):  $\delta$  10.8-11.8 (brs, 1H), 7.72 (d,  $J$  = 2.0 Hz, 1H), 7.47 (dd,  $J$  = 9.0, 2.0 Hz, 1H), 7.02 (d,  $J$  = 9.0 Hz, 1H), 4.27 (s, 3H), 4.18 (q,  $J$  = 7.0 Hz, 2H), 4.11 (q,  $J$  = 7.0 Hz, 2H), 1.37 (t,  $J$  = 7.0 Hz, 3H), 1.28 (t,  $J$  = 7.0 Hz, 3H);  $^{13}\text{C}$  NMR (125 MHz,  $\text{CDCl}_3$ ):  $\delta$  157.2, 155.1, 150.5, 147.9, 145.7, 135.2, 129.4, 120.3, 113.9, 111.2, 108.2, 39.0, 36.8, 35.2, 13.5, 13.4; HRMS (ESI)  $m/z$   $\text{C}_{16}\text{H}_{18}\text{BrN}_4\text{O}_3$  ( $\text{M}+\text{H}$ ) $^+$ : calcd 393.0562, obsd 393.0548.

**Procedure 11: 8-(2-(benzyloxy)-5-bromophenyl)-1,3-diethyl-7-methyl-1H-purine-2,6(3H,7H)-dione**

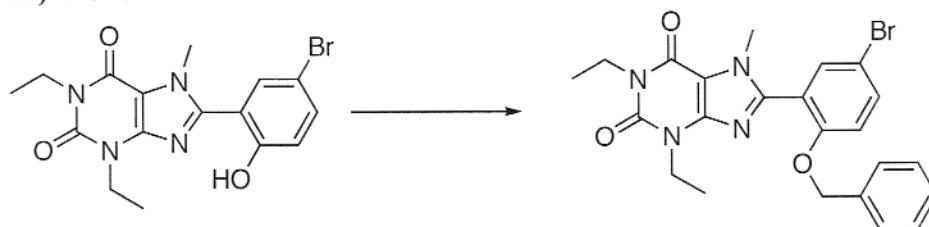

Benzyl bromide (7.7  $\mu$ L, 1.5 equiv) was added to a solution of 8-(5-bromo-2-hydroxyphenyl)-1,3-diethyl-7-methyl-1H-purine-2,6(3H,7H)-dione (0.017g, 0.0432mmol) and potassium carbonate (0.018g, 3 equiv) in dimethylformamide (2 mL) at 25°C. The resulting solution was heated to 70°C for 3h and cooled to 25°C. The solution was diluted with water (10 mL) and brought to pH ~ 2 by the slow addition of 5% HCl. The aqueous layer was extracted with dichloromethane (3x 10mL) and the combined extracts washed with brine (10 mL), dried with  $\text{MgSO}_4$  and concentrated in vacuo. The crude residue was purified by preparative thin layer chromatography (hexanes/ ethyl acetate = 3:1) to afford the title compound (0.0194g, 93%) as a yellow solid. Mp = 56-57 °C; TLC (hexane/ ethyl acetate = 1:1):  $R_f$  0.48;  $^1\text{H}$  NMR (500 MHz,  $\text{CDCl}_3$ ):  $\delta$  7.59 (d,  $J$  = 2.0Hz, 1H), 7.55 (dd,  $J$  = 8.5, 2.0 Hz, 1H), 7.23-7.39 (m, 5H), 6.96 (d,  $J$  = 8.5 Hz, 1H), 5.11 (s, 2H), 4.20 (q,  $J$  = 7.0 Hz, 2H), 4.10 (q,  $J$  = 7.0 Hz, 1H), 3.80 (s, 3H), 1.38 (t,  $J$  = 7.0 Hz, 3H), 1.27 (t,  $J$  = 7.0 Hz, 3H);  $^{13}\text{C}$  NMR (125 MHz,  $\text{CDCl}_3$ ):  $\delta$  155.9, 155.4, 150.9, 148.7, 147.9, 135.7, 135.0, 134.9, 128.9, 128.6, 127.3, 120.4, 115.0, 113.8, 108.8, 71.4, 38.7, 36.6, 33.5, 13.7, 13.5; HRMS (ESI)  $m/z$   $\text{C}_{23}\text{H}_{24}\text{BrN}_4\text{O}_3$  ( $\text{M}+\text{H}$ ) $^+$ : calcd 483.1032, obsd 483.1026.

**Procedure 12: 1,3-diethyl-8-(4-fluorophenyl)-7-methyl-1H-purine-2,6(3H,7H)-dione**

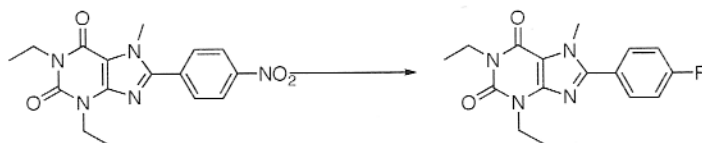

Anhydrous TBAF (1M in DMSO, 3 equiv, 262  $\mu$ L) was added to a solution of 1,3-diethyl-7-methyl-8-(4-nitrophenyl)-1H-purine-2,6(3H,7H)-dione (0.030g, 0.0873mmol) in DMSO (0.5 mL) and exposed to microwave irradiation (300W) at 180  $^{\circ}$ C for 10 minutes and cooled to 25  $^{\circ}$ C. The reaction mixture was diluted with water (10 mL) and extracted with dichloromethane (3x 10 mL). The combined extracts were washed with brine (10 mL), dried over  $\text{MgSO}_4$  and concentrated in vacuo. The crude residue was purified by preparative thin layer chromatography (hexanes/ ethyl acetate = 3:1) to afford the title compound (0.0031g, 11%) as a white solid and recovered starting material (0.0189g, 63%). Mp = 162-165  $^{\circ}$ C; TLC (hexane/ ethyl acetate = 4:1):  $R_f$  0.27;  $^1\text{H}$  NMR (500 MHz,  $\text{CDCl}_3$ ):  $\delta$  7.65-7.71 (m, 2H), 7.23 (t,  $J$  = 8.5 Hz, 2H), 4.21 (q,  $J$  = 7.0 Hz, 2H), 4.11 (q,  $J$  = 7.0 Hz, 2H), 4.05 (s, 3H), 1.37 (t,  $J$  = 7.0 Hz, 3H), 1.27 (t,  $J$  = 7.0 Hz, 3H);  $^{13}\text{C}$  NMR (125 MHz,  $\text{CDCl}_3$ ):  $\delta$  165.0, 163.0, 155.5, 151.2, 150.9, 147.9, 131.5, 131.4, 124.8, 116.4, 116.2, 108.9, 38.6, 36.6, 33.9, 13.6, 13.5; HRMS (ESI)  $m/z$   $\text{C}_{16}\text{H}_{18}\text{FN}_4\text{O}_2$  ( $\text{M}+\text{H}$ ) $^{+}$ : calcd 317.1414, obsd 317.1402.

**Procedure 13: (E)-8-[2-(3,4-Dimethoxyphenyl) vinyl]-1,3-diethyl-7-methyl-3, 7 dihydropurine-2,6-dione (KW 6002).<sup>5</sup>**

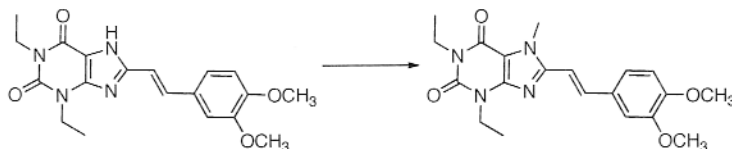

$\text{K}_2\text{CO}_3$  (1.35g, 9.43mmol) was added to a solution of compound 3-5 (2.02g, 5.45mmol) in dry DMF (27mL). Iodomethane (0.68mL, 10.77mmol) was added and the reaction mixture was stirred at room temperature for 1h. The formed precipitate was filtered off. The filtrate was diluted with water (30 mL) and the resulting mixture was extracted with chloroform (3 $^{\circ}$ —100 mL). The organic extracts were washed with water (100 mL) and brine (100 mL), dried with  $\text{MgSO}_4$  and evaporated in vacuo. The residue was purified via flash chromatography to give the title compound as a yellow solid. (2.0g, 95%) mp=191-195  $^{\circ}$ C; TLC (hexanes: ethyl acetate = 3: 2):  $R_f$  0.22  $^1\text{H}$  NMR (500 MHz,  $\text{CDCl}_3$ ): 1.23 (t,  $J$  = 7.0 Hz, 3H), 1.36 (t,  $J$  = 7.0 Hz, 3H), 3.90 (s, 3H), 3.93 (s, 3H), 4.03 (s, 3H), 4.07 (q,  $J$  = 7.0 Hz, 2H), 4.18 (q,  $J$  = 7.0 Hz, 2H), 6.74 (d,  $J$  = 15.5 Hz, 1H), 6.87 (d,  $J$  = 8.5 Hz, 1H), 7.06 (d,  $J$  = 2.0 Hz, 1H), 7.15 (dd,  $J$  = 8.5, 2.0 Hz, 1H), 7.70 (d,  $J$  = 15.5 Hz, 1H)  $^{13}\text{C}$  NMR (75 MHz,  $\text{CDCl}_3$ ):  $\delta$  13.3, 13.4, 31.5, 36.3, 38.4, 55.9, 56.0, 108.0, 109.3, 109.5, 111.2, 121.2, 128.6, 138.1, 148.2, 149.2, 150.2, 150.4, 150.7, 155.0 HRMS (ESI),  $m/z$  ( $\text{M}+\text{H}$ ) $^{+}$ : calcd 384.1798, obsd 384.1789. Elemental Analysis: ( $\text{C}_{20}\text{H}_{24}\text{N}_4\text{O}_4$ ) calcd (%): C, 62.48; H, 6.29; N, 14.57; found (%): C, 62.45; H, 6.39; N, 14.55

<sup>5</sup> EP 0590919.

**8-(4-bromophenyl)-1,3-diethyl-1H-purine-2,6(3H,7H)-dione:**

*Procedure 2:* yellow solid. (72 mg, 79%) mp > 300 °C ; <sup>1</sup>H NMR (500 MHz, DMSO-d<sub>6</sub>): δ 1.13 (t, J = 7.0Hz, 3H), 1.26 (t, J = 7.0Hz, 3H), 3.94 (q, J = 7.0Hz, 2H), 4.08 (q, J = 7.0Hz, 2H), 7.01 (d, J = 8.5Hz, 2H), 8.05 (d, J = 8.5Hz, 2H), 13.89 (br, 1H). HRMS (ESI), m/z (M+H)<sup>+</sup>: calcd 362.0378, obsd 362.0369.

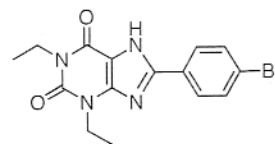

**1,3-diethyl-8-(4-fluorophenyl)-1H-purine-2,6(3H,7H)-dione:**

*Procedure 2:* white solid. (53 mg, 70%) mp > 300 °C ; <sup>1</sup>H NMR (500 MHz, DMSO-d<sub>6</sub>): δ 1.14 (t, J = 7.0Hz, 3H), 1.27 (t, J = 7.0Hz, 3H), 3.95 (q, J = 7.0Hz, 2H), 4.08 (q, J = 7.0Hz, 2H), 7.37 (m, 2H), 8.18 (m, 2H), 13.85 (br, 1H). HRMS (ESI), m/z (M+H)<sup>+</sup>: calcd 302.1179, obsd 302.1159.

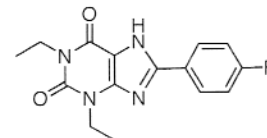

**1,3-diethyl-8-(4-nitrophenyl)-1H-purine-2,6(3H,7H)-dione:**

*Procedure 2:* yellow solid. (57 mg, 79%) mp > 300 °C ; <sup>1</sup>H NMR (500 MHz, DMSO-d<sub>6</sub>): δ 1.15 (t, J = 7Hz, 3H), 1.29 (t, J = 7Hz, 3H), 3.96 (q, J = 7.5Hz, 2H), 4.11 (q, J = 7Hz, 2H), 8.37 (s, 4H). HRMS (ESI), m/z (M+H)<sup>+</sup>: calcd 329.1124, obsd 329.1124

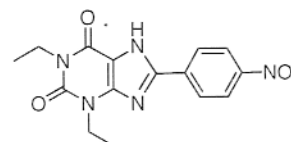

**1,3-diethyl-8-(2-nitrophenyl)-1H-purine-2,6(3H,7H)-dione :**

*Procedure 2:* yellow solid. (59 mg, 72%) mp > 300 °C ; <sup>1</sup>H NMR (500 MHz, DMSO-d<sub>6</sub>): δ 1.15 (t, J = 7.0Hz, 3H), 1.21 (t, J = 7.0Hz, 3H), 3.95 (q, J = 7.5Hz, 2H), 3.99 (q, J = 7.5Hz, 2H), 7.74-7.76 (m, 1H), 7.83-7.86 (m, 1H), 7.93 (d, J = 7.5Hz, 1H), 8.03 (d, J = 7.5Hz, 1H). HRMS (ESI), m/z (M+H)<sup>+</sup>: calcd 329.1124, obsd 329.1111.

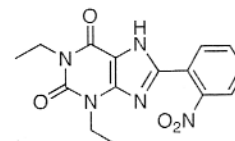

**1,3-diethyl-8-(4-methoxyphenyl)-1H-purine-2,6(3H,7H)-dione:**

*Procedure 2:* yellow solid. (56 mg, 71%) mp > 300 °C ; <sup>1</sup>H NMR (500 MHz, DMSO-d<sub>6</sub>): δ 1.14 (t, J = 7.0Hz, 3H), 1.27 (t, J = 7.0Hz, 3H), 3.82 (s, 3H), 3.95 (q, J = 7.5Hz, 2H), 4.09 (q, J = 7.5Hz, 2H), 7.06 (d, J = 9.0Hz, 2H), 8.08 (d, J = 9Hz, 2H), 13.61 (br, 1H). HRMS (ESI), m/z (M+H)<sup>+</sup>: calcd 314.1379, obsd 314.1392.

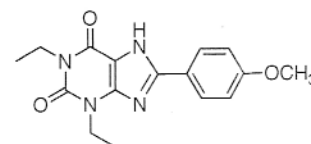

**8-(4-(dimethylamino) phenyl)-1,3-diethyl-1H-purine-2,6(3H,7H)-dione:**

*Procedure 2:* yellow solid (53 mg, 66%). mp > 300 °C <sup>1</sup>H NMR (500 MHz, DMSO-d<sub>6</sub>): δ 1.14 (t, J = 7.0Hz, 3H), 1.27 (t, J = 7.0Hz, 3H), 2.98 (s, 3H), 3.33 (s, 3H), 3.94 (q, J = 7.5Hz, 2H), 4.08 (q, J = 7.5Hz, 2H), 6.77 (d, J = 9.5Hz, 2H), 7.96 (d, J = 9.5Hz, 2H), 13.35 (br, 1H). HRMS (ESI), m/z (M+H)<sup>+</sup>: calcd 327.1695, obsd 327.1678.

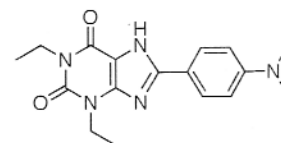

**8-(3,4-dimethoxyphenyl)-1,3-diethyl-1H-purine-2,6(3H,7H)-dione:**

*Procedure 2:* Yellow solid (54mg, 63%). mp > 300 °C ; <sup>1</sup>H NMR (500 MHz, DMSO-d<sub>6</sub>): δ 1.14 (t, J = 7.5Hz, 3H), 1.27 (t, J = 7.5Hz, 3H), 3.82 (s, 3H), 3.84 (s, 3H), 3.95 (q, J = 7.5Hz, 2H), 4.09 (q, J = 7.5Hz, 2H), 7.08 (d, J = 8.0Hz, 1H), 7.71-7.74 (m, 2H) HRMS (ESI), m/z (M+H)<sup>+</sup>: calcd 344.1485, obsd 344.1475.

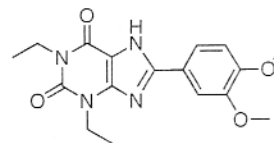

**1,3-diethyl-8-(naphthalen-2-yl)-1H-purine-2,6(3H,7H)-dione:**

*Procedure 2:* yellow solid (61mg, 74%). mp > 300 °C ; <sup>1</sup>H NMR (500 MHz, DMSO-d<sub>6</sub>): δ 1.16 (t, J = 7.5Hz, 3H), 1.31 (t, J = 7.5Hz, 3H), 3.97 (q, J = 7.0Hz, 2H), 4.14 (q, J = 7.0Hz, 2H), 7.08 (d, J = 8.0Hz, 1H), 7.58-7.61 (m, 2H), 7.96-7.99 (m, 1H), 8.01-8.06 (m, 2H), 8.25 (dd, J = 10.0, 2.0Hz, 1H), 8.73 (s, 1H), 14.01 (br, 1H) HRMS (ESI), m/z (M+H)<sup>+</sup>: calcd 334.1430, obsd 334.1449.

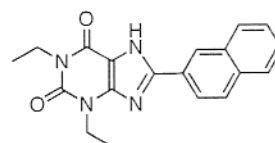

**(E)-1,3-diethyl-8-(4-methoxystyryl)-1H-purine-2,6(3H,7H)-dione:**

*Procedure 2:* yellow solid (54mg, 63%). mp > 300 °C ; <sup>1</sup>H NMR (500 MHz, DMSO-d<sub>6</sub>): δ 1.13 (t, J = 7.5Hz, 3H), 1.25 (t, J = 7.5Hz, 3H), 3.79 (s, 1H), 3.93 (q, J = 7.0Hz, 2H), 4.06 (q, J = 7.0Hz, 2H), 6.89 (d, J = 17.0Hz, 1H), 6.98 (d, J = 9.0Hz, 1H), 7.56-7.62 (m, 2H), 13.46 (br, 1H) HRMS (ESI), m/z (M+H)<sup>+</sup>: calcd 340.1535, obsd 340.1521.

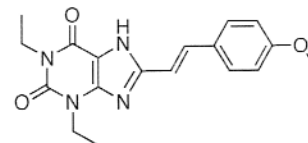

**1,3-diethyl-8-(2-hydroxyphenyl)-1H-purine-2,6(3H,7H)-dione:**

*Procedure 2:* yellow solid (50mg, 66%). mp > 300 °C ; <sup>1</sup>H NMR (500 MHz, DMSO-d<sub>6</sub>): δ 1.14 (t, J = 7.0Hz, 3H), 1.27 (t, J = 7.0Hz, 3H), 3.95 (q, J = 7.0Hz, 2H), 4.08 (q, J = 7.0Hz, 2H), 6.62-6.98 (m, 2H), 7.30-7.33 (m, 1H), 8.06 (d, J = 7.5Hz, 1H). HRMS (ESI), m/z (M+H)<sup>+</sup>: calcd 300.1222, obsd 300.1220.

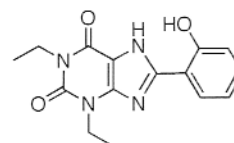

**2-(1,3-diethyl-2,6-dioxo-2,3,6,7-tetrahydro-1H-purin-8-yl)benzoic acid:**

*Procedure 2:* yellow solid (56mg, 68%). mp > 300 °C ; <sup>1</sup>H NMR (300 MHz, DMSO-d<sub>6</sub>): δ 1.11 (t, J=6.8Hz, 3H), 1.24 (t, J=7.2, 3H), 3.92 (q, J=6.8, 2H), 4.05 (q, J=6.8, 2H), 7.46-7.57 (m, 2H), 7.90 (d, J=7.6, 1H), 8.02 (d, J=7.2, 1H) HRMS (ESI), m/z (M+H)<sup>+</sup>: calcd 328.1172, obsd 328.1188.

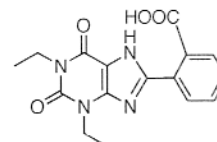

**1,3-diethyl-8-(furan-2-yl)-1H-purine-2,6(3H,7H)-dione:**

*Procedure 2:* white solid (41mg, 60%). mp > 300 °C ; <sup>1</sup>H NMR (500 MHz, CDCl<sub>3</sub>): δ 1.32 (t, J = 7.0Hz, 3H), 1.40 (t, J = 7.0Hz, 3H), 4.18 (q, J = 7.0Hz, 2H), 4.26 (q, J = 7.0Hz, 2H), 6.59-6.60 (m, 1H), 7.24-7.26 (m, 1H), 7.58-7.59 (m, 1H), 11.58 (br, 1H) HRMS (ESI), m/z (M+H)<sup>+</sup>: calcd 274.1066, obsd 274.1085.

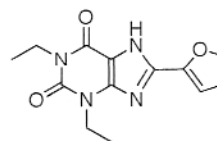

**8-cyclohexyl-1,3-diethyl-1*H*-purine-2,6(3*H*,7*H*)-dione:**

*Procedure 2:* white solid (49mg, 68%). mp > 300 °C ; <sup>1</sup>H NMR (500 MHz, DMSO-d<sub>6</sub>): δ 1.10 (t, J = 7.0Hz, 3H), 1.20 (t, J = 7.0Hz, 3H), 1.27-1.36 (m, 2H), 1.50-1.58 (m, 2H), 1.62-1.68 (m, 2H), 1.72-1.78 (m, 2H), 1.86-1.90 (m, 2H), 2.69-2.75 (m, 1H), 3.90 (q, J = 7.0Hz, 2H), 3.99 (q, J = 7.0Hz, 2H), 13.05 (br, 1H) HRMS (ESI), m/z (M+H)<sup>+</sup>: calcd 290.1740, obsd 290.1755.

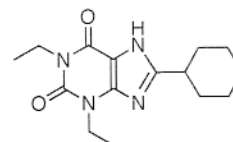

**1,3-diethyl-8-pentyl-1*H*-purine-2,6(3*H*,7*H*)-dione:**

*Procedure 2:* white solid (47mg, 68%). mp > 300 °C ; <sup>1</sup>H NMR (500 MHz, DMSO-d<sub>6</sub>): δ 0.85 (t, J = 7.0Hz, 3H), 1.10 (t, J = 7.5Hz, 3H), 1.20 (t, J = 7.0Hz, 3H), 1.21-1.31 (m, 4H), 1.64-1.70 (m, 2H), 2.65 (t, J = 7.5Hz, 2H), 3.90 (q, J = 7.0Hz, 2H), 4.00 (q, J = 7.0Hz, 2H) HRMS (ESI), m/z (M+H)<sup>+</sup>: calcd 278.1743, obsd 278.1744.

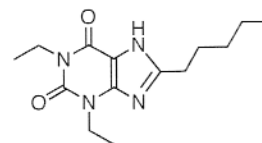

**(*E*)-1,3-diethyl-8-(pent-1-enyl)-1*H*-purine-2,6(3*H*,7*H*)-dione:**

*Procedure 2:* white solid (48mg, 70%). mp > 300 °C ; <sup>1</sup>H NMR (500 MHz, DMSO-d<sub>6</sub>): δ 0.91 (t, J = 7Hz, 3H), 1.11 (t, J = 7.5Hz, 3H), 1.21 (t, J = 7.0Hz, 3H), 1.40-1.52 (m, 2H), 1.17-1.24 (m, 2H), 3.91 (q, J = 7.0Hz, 2H), 4.01 (q, J = 7.0Hz, 2H), 6.28 (d, J = 16.0Hz, 1H), 6.76-6.87 (m, 1H) HRMS (ESI), m/z (M+H)<sup>+</sup>: calcd 276.1586, obsd 276.1602.

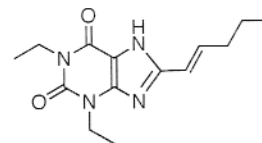

**(*E*)-8-(3,4-dimethoxystyryl)-1,3-diethyl-1*H*-purine-2,6(3*H*,7*H*)-dione:**

*Procedure 2:* yellow solid compared to literature characterisation values (3.27 mg, 58%) . m.p. 260-262°C<sup>6</sup>

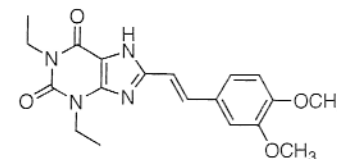

**(*E*)-8-[2-(4, 5-Dimethoxy-2-nitro-phenyl) vinyl]-1, 3-diethyl-3, 7-dihydropurine-2, 6-Dione:**

*Procedure 2:* Yellow solid. (3.39g, 60%) mp=268-269 °C; TLC (MeOH: CH<sub>2</sub>Cl<sub>2</sub> = 05:9.5): R<sub>f</sub> 0.63 <sup>1</sup>H NMR (500 MHz, CDCl<sub>3</sub>): δ 1.12 (t, J = 7.0Hz, 3H), 1.28 (t, J = 7.0Hz, 3H), 3.96 (q, J = 7.0Hz, 2H), 4.02 (d, 6H), 4.08 (q, J = 7.0Hz, 2H) 6.6-6.56 (q, 1H). 7.02 (s, 1H) 7.68 (s, 1H), 8.17-8.14 (d, 1H), 9.7 (d, 1H). δ <sup>13</sup>C NMR (75 MHz, CDCl<sub>3</sub>): δ 13.4, 13.5, 36.9, 39.0, 55.8, 56.0, 107.3, 109.1, 111.2, 113.4, 121.2, 128.6, 136.8, 149.3, 149.6, 150.4, 150.5, 151.7, 155.6. HRMS (ESI), m/z (M+H)<sup>+</sup>: calcd 370.1641, obsd 370.1647.

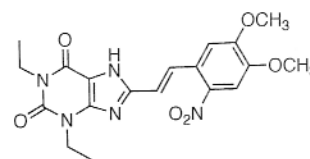

<sup>6</sup> EP 0590919.

**(E)-8-[2-(4-Dimethoxyphenyl) vinyl]-1, 3-diethyl-3, 7-dihydropurine-2, 6-Dione:**

*Procedure 2:* yellow solid (189mg, 62%). mp=244-246°C ; TLC (MeOH: CH<sub>2</sub>Cl<sub>2</sub> = 0.5:9.5): R<sub>f</sub> 0.43 <sup>1</sup>H NMR (300 MHz, DMSO-d<sub>6</sub>): δ 1.17 (t, *J* = 7.2 Hz, 3H), 1.29 (t, *J* = 7.2 Hz, 3H), 3.84 (s, 3H), 3.97 (q, *J* = 7.2 Hz, 2H), 4.10 (q, *J* = 6.8 Hz, 2H), 5.79 (s, 1H), 6.94 (d, *J* = 16.2 Hz, 1H), 7.03 (d, *J* = 8.9 Hz, 2H), 7.61 (d, *J* = 8.9 Hz, 2H), 7.65 (d, *J* = 16.2 Hz, 1H) <sup>13</sup>C NMR (75 MHz, DMSO-d<sub>6</sub>): δ 14.1, 36.5, 38.9, 39.6, 56.1, 107.9, 114.2, 115.3, 128.9, 129.5, 128.6, 135.8, 148.9, 149.6, 150.9, 151.1, 154.5, 161.0. HRMS (ESI), *m/z* (M+H)<sup>+</sup>: calcd 340.1535, obsd 340.1551.

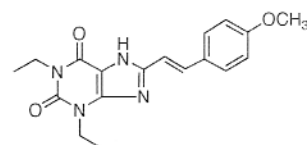

**4,5-Dimethoxy-2-nitro-cinnamaldehyde<sup>7</sup>**

*Procedure 5* yellow solid (2.4 mg, 75%). mp. 103-105 °C <sup>1</sup>H NMR (500 MHz, CDCl<sub>3</sub>): 9.78-9.72 (d, 1H) 8.17-8.14 (d, 1H), 7.68 (s, 1H), 7.02 (s, 1H) 6.6-6.56 (q, 1H) 4.01 (d, 6H).

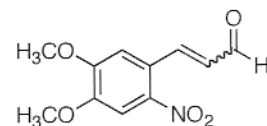

**(E)-4-(2-(1,3-diethyl-2,6-dioxo-2,3,6,7-tetrahydro-1H-purin-8-yl)vinyl)phenyl 2-aminopropanoate, (Alanine E-4-(2-(1,3-diethyl-2,6-dioxo-7-methylpurin-8-yl)ethenyl)phenyl ester).**

*Procedure 7:* white solid (128 mg, 80% two steps). TLC (MeOH: CH<sub>2</sub>Cl<sub>2</sub> = 1: 9): R<sub>f</sub> 0.41 mp=277-281°C <sup>1</sup>H NMR (500 MHz, DMSO-d<sub>6</sub>): δ 1.13 (t, *J* = 7.0 Hz, 3H), 1.26 (t, *J* = 7.5 Hz, 3H), 1.58 (d, *J* = 6.0 Hz, 3H), 2.50 (m, 2H), 3.92 (q, *J* = 6.0 Hz, 2H), 4.05 (s, 3H), 4.07 (q, *J* = 6.0 Hz, 2H), 4.21 (m, 1H), 4.44 (m, 1H), 7.26 (d, *J* = 8.5 Hz, 2H), 7.39 (d, *J* = 15.5 Hz, 1H), 7.69 (d, *J* = 16.0 Hz, 1H), 7.93 (d, *J* = 9.0 Hz, 2H), 8.48 (br, 2H) <sup>13</sup>C NMR (75 MHz, DMSO-d<sub>6</sub>): δ 14.42, 17.02, 32.88, 38.16, 40.31, 110.24, 114.45, 123.72, 130.69, 136.58, 138.65, 150.14, 152.62, 152.93, 153.04, 156.98, 170.67

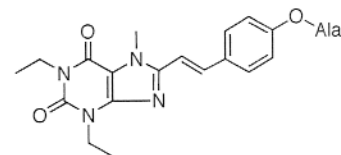

HRMS (ESI), *m/z* (M+H)<sup>+</sup>: calcd 411.1907, obsd 411.1922.

**8-(2'-chloro-5'-(trifluoromethyl)biphenyl-4-yl)-1,3-diethyl-1H-purine-2,6(3H,7H)-dione**

*Procedure 8:* white solid (0.0204g, 81%) M.p. = 195-197 °C; TLC (Hexane/ ethyl acetate = 4:1): R<sub>f</sub> 0.37; <sup>1</sup>H NMR (500 MHz, CDCl<sub>3</sub>): δ 7.80 (d, *J* = 8.0 Hz, 2H), 7.57-7.67 (m, 5H), 4.24 (q, *J* = 7.0 Hz, 2H), 4.13 (s, 3H), 4.12 (q, *J* = 7.0 Hz, 2 Hz), 1.40 (t, *J* = 7.0 Hz, 3H), 1.29 (t, *J* = 7.0 Hz, 3H); <sup>13</sup>C NMR (125 MHz, CDCl<sub>3</sub>): δ 155.6, 151.5, 150.9, 148.0, 140.3, 140.1, 136.5, 130.9, 130.1, 129.9, 129.6, 129.3, 128.1-128.6 (q, *J*=62.5 Hz, 1C), 125.9-126.1 (q, *J*=25 Hz, 1C), 124.8, 122.7, 109.1, 38.6, 36.6, 34.1, 13.6, 13.5; HRMS (ESI) *m/z* C<sub>23</sub>H<sub>21</sub>N<sub>4</sub>O<sub>2</sub>ClF<sub>3</sub> (M+H)<sup>+</sup>: calcd 477.1305, obsd 477.1313.

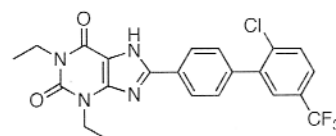

<sup>7</sup> USP 6084120

**8-(2'-chloro-4-methoxy-5'-(trifluoromethyl)biphenyl-3-yl)-1,3-diethyl-7-methyl-1H-purine-2,6(3H,7H)-dione**

*Procedure 8:* white solid. (0.015 g, 78%) Mp = 119-120 °C; TLC (hexane/ ethyl acetate = 1:1): R<sub>f</sub> 0.32; <sup>1</sup>H NMR (500 MHz, CDCl<sub>3</sub>): δ 7.52-7.65 (m, 5H), 7.12 (d, J = 8.5 Hz, 1H), 4.20 (q, J = 7.0 Hz, 2H), 4.12 (q, J = 7.0 Hz, 2H), 3.93 (s, 3H), 3.87 (s, 3H), 1.36 (t, J = 7.0 Hz, 3H), 1.28 (t, J = 7.0 Hz, 3H); <sup>13</sup>C NMR (125 MHz, CDCl<sub>3</sub>): δ 157.6, 155.7, 151.0, 149.8, 148.1, 140.0, 136.7, 133.5, 133.3, 131.2, 130.9, 129.9, 129.7, 128.4-128.6 (q, J = 25.0 Hz, 1C), 126.6-126.15 (q, J = 56.25 Hz, 1C), 118.1, 111.4, 109.0, 56.1, 38.8, 36.7, 33.5, 13.8, 13.6; HRMS (ESI) m/z C<sub>24</sub>H<sub>23</sub>ClF<sub>3</sub>N<sub>4</sub>O<sub>3</sub> (M+H)<sup>+</sup>: calcd 507.1411, obsd 507.1410.

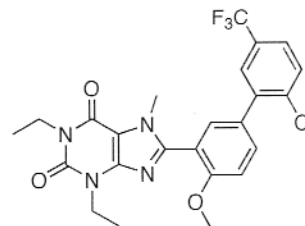

**1,3-diethyl-7-methyl-8-(4-nitrophenyl)-1H-purine-2,6(3H,7H)-dione**

*Procedure 10:* white solid (0.071g, 99%). Mp = 222-224 °C; TLC (hexane/ ethyl acetate = 4:1): R<sub>f</sub> 0.25; <sup>1</sup>H NMR (500 MHz, CDCl<sub>3</sub>): δ 8.39 (d, J = 9.0 Hz, 2H), 7.94 (d, J = 9.0 Hz, 2H), 4.22 (q, J = 7.0 Hz, 2H), 4.15 (s, 3H), 4.11 (q, J = 7.0 Hz, 2H), 1.38 (t, J = 7.0 Hz, 3H), 1.28 (t, J = 7.0 Hz, 3H); <sup>13</sup>C NMR (125 MHz, CDCl<sub>3</sub>): δ 155.4, 150.6, 149.2, 148.5, 147.8, 134.6, 130.1, 124.1, 109.6, 38.6, 36.6, 34.1, 13.5, 13.3; HRMS (ESI) m/z C<sub>16</sub>H<sub>18</sub>N<sub>5</sub>O<sub>4</sub> (M+H)<sup>+</sup>: calcd 344.1359, obsd 344.1364.

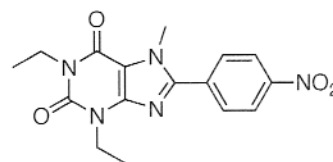

Scanned  
Nuclear Magnetic Resonance  
Spectra



S17

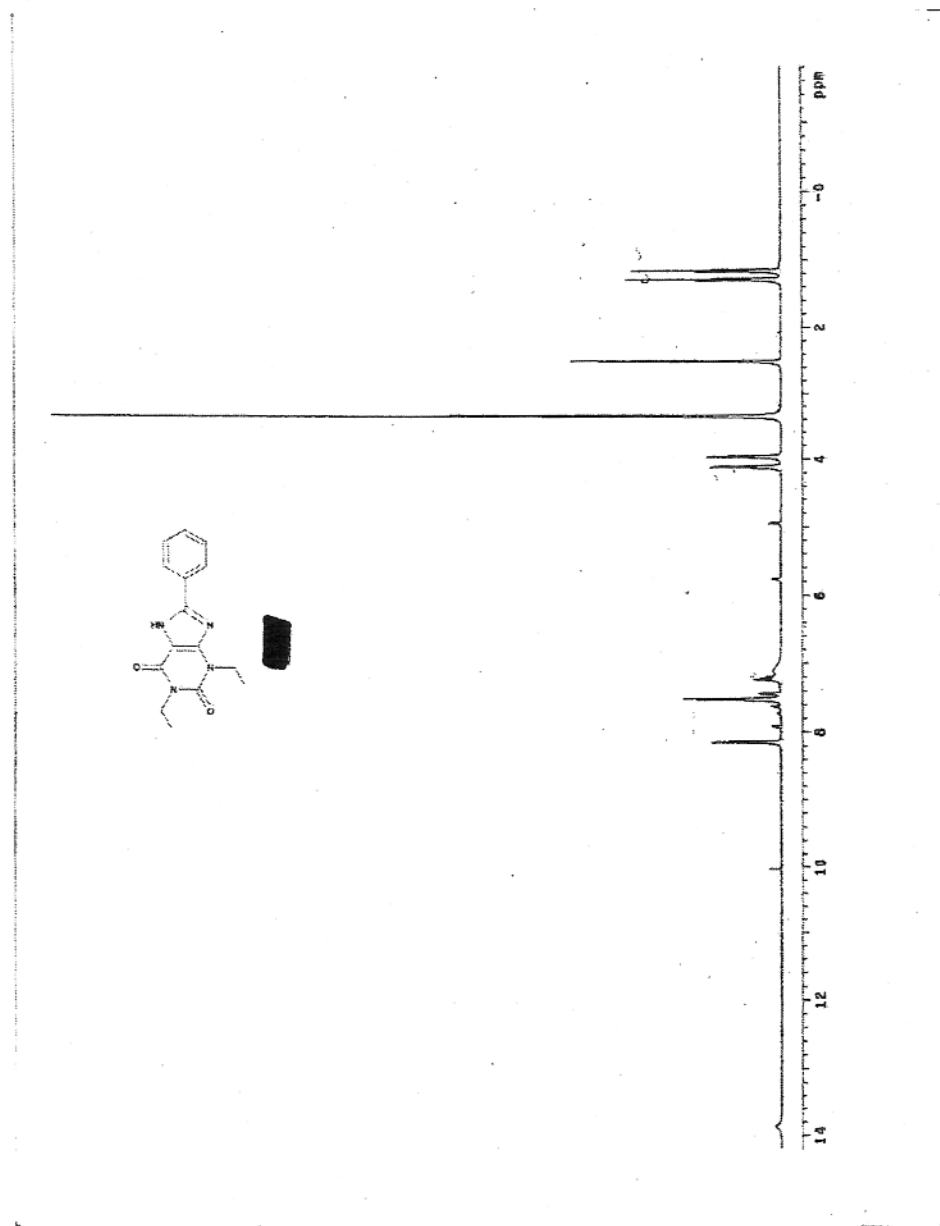

STANDARD PROTON PARAMETERS

Pulse Sequence: s2pul

Solvent: DMSO

Ambient temperature

INQVA-500 "water500"

Pulse 45.0 degrees

Acq time 2.043 sec

Width 8000.0 Hz

54 repetitions

OBSERVE H1 499.7053338 MHz

DATA PROCESSING

FI size 32768

Total time 17 min, 8 sec

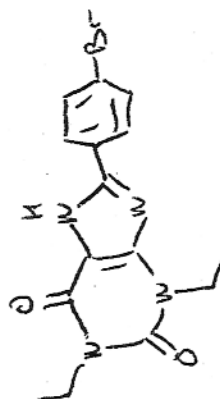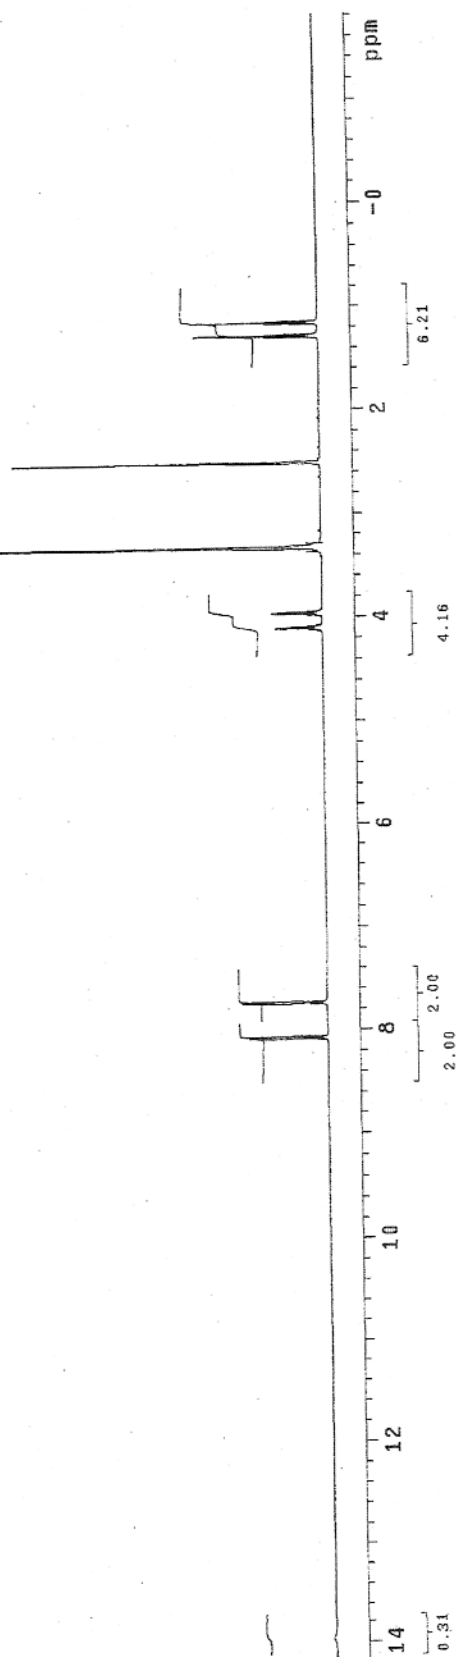

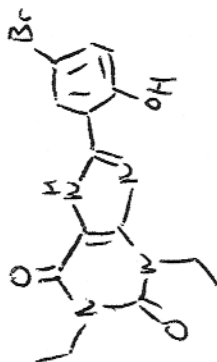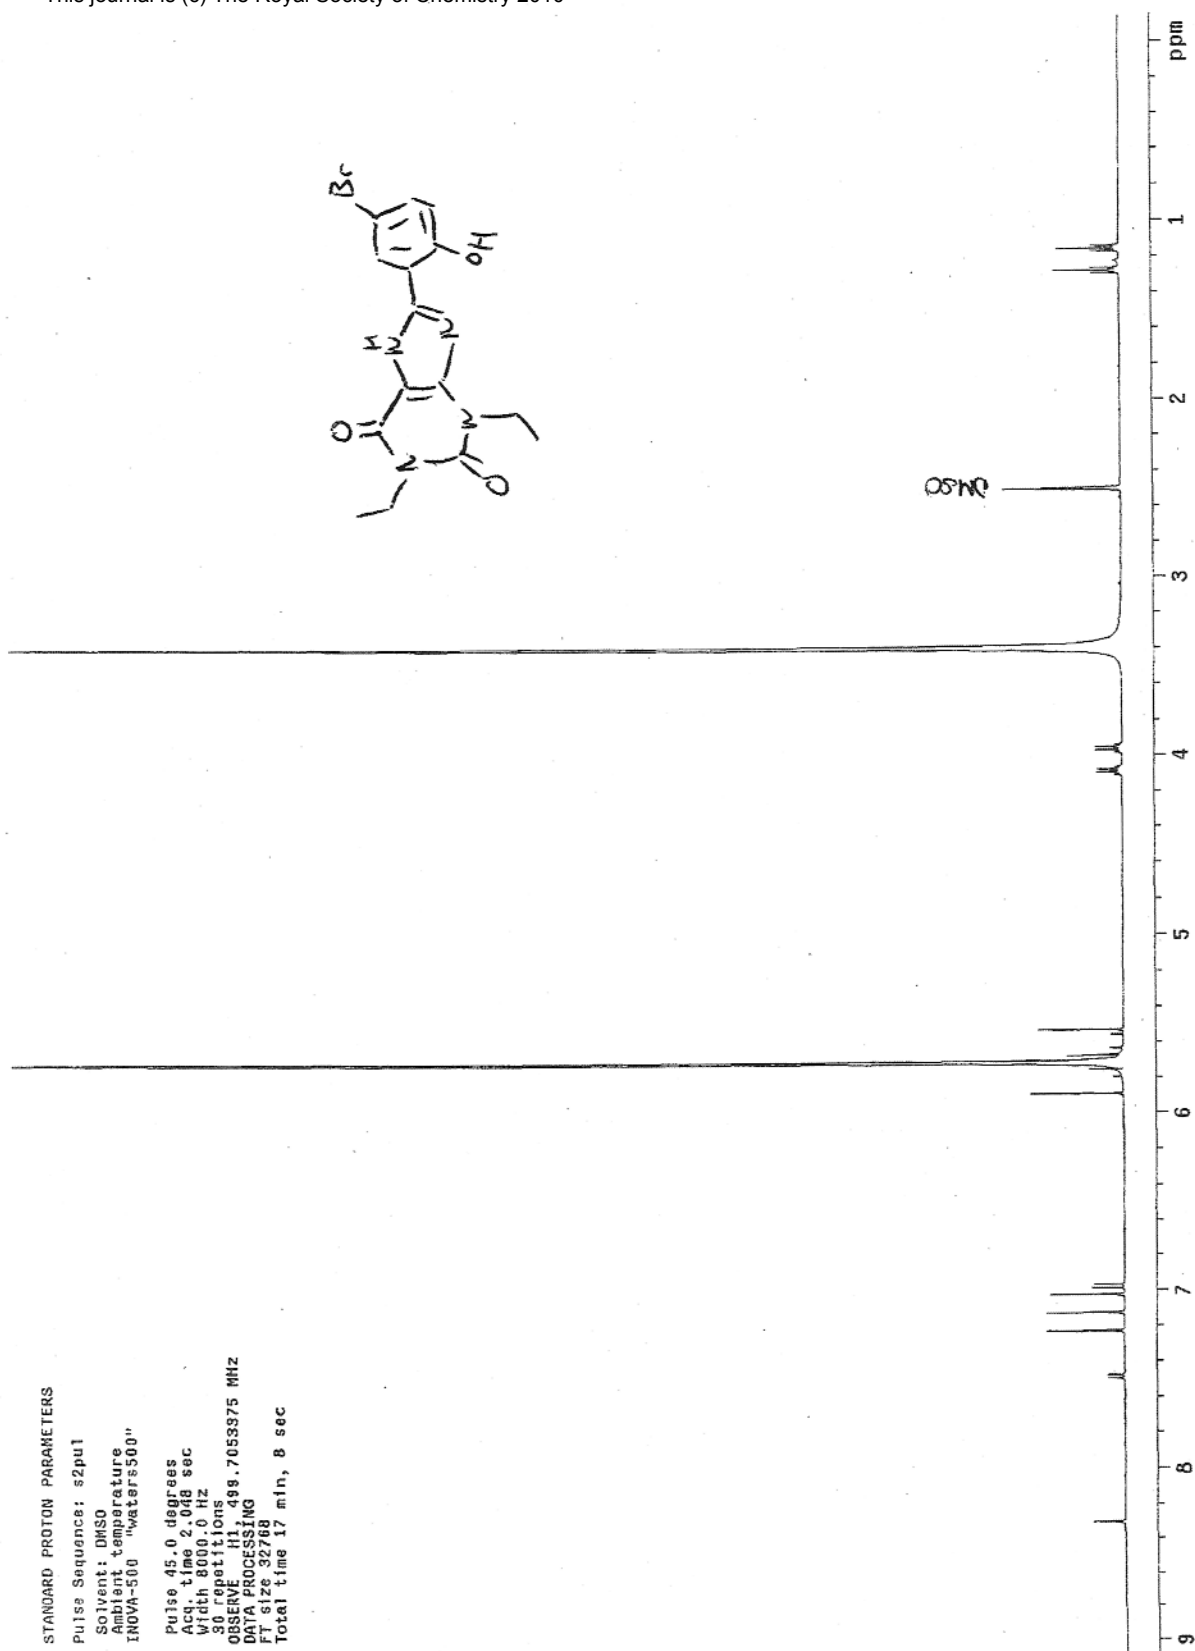

STANDARD PROTON PARAMETERS

Pulse Sequence: s2pul

Solvent: DMSO

Ambient temperature

INOVA-500 "waters500"

Pulse 45 0 degrees

Pulse 45.0 degrees  
Acq. time 2.048 sec

Acq. time 2.046 sec  
Width 8000.0 Hz

30 repetitions  
080E0E H1 499 7058

OBSERVE H1, 499.7053  
DATA PROCESSING

DATA PROCESSING  
FT size 32768

Total time 17 min, 8 s

STANDARD CARBON PARAMETERS dpwr=34, sw=34,000 HZ

Pulse Sequence: s2pul

Solvent: DMSO

Ambient temperature

User: j11007

INNOVA-500 "water500"

Pulse 27.7 degrees

Acq. time 0.364 sec

Width 3399.2 Hz

45856 repetitions

OBSERVE C13, 125.8503761 MHz

DECOUPLE H1, 499.7083524 MHz

Power 34 dB

on during acquisition

off during delay

GARP-1 modulated

DATA PROCESSING

Line broadening 1.0 Hz

FT size 85536

Total time 27 hr, 1 min, 9 sec

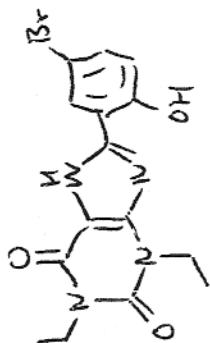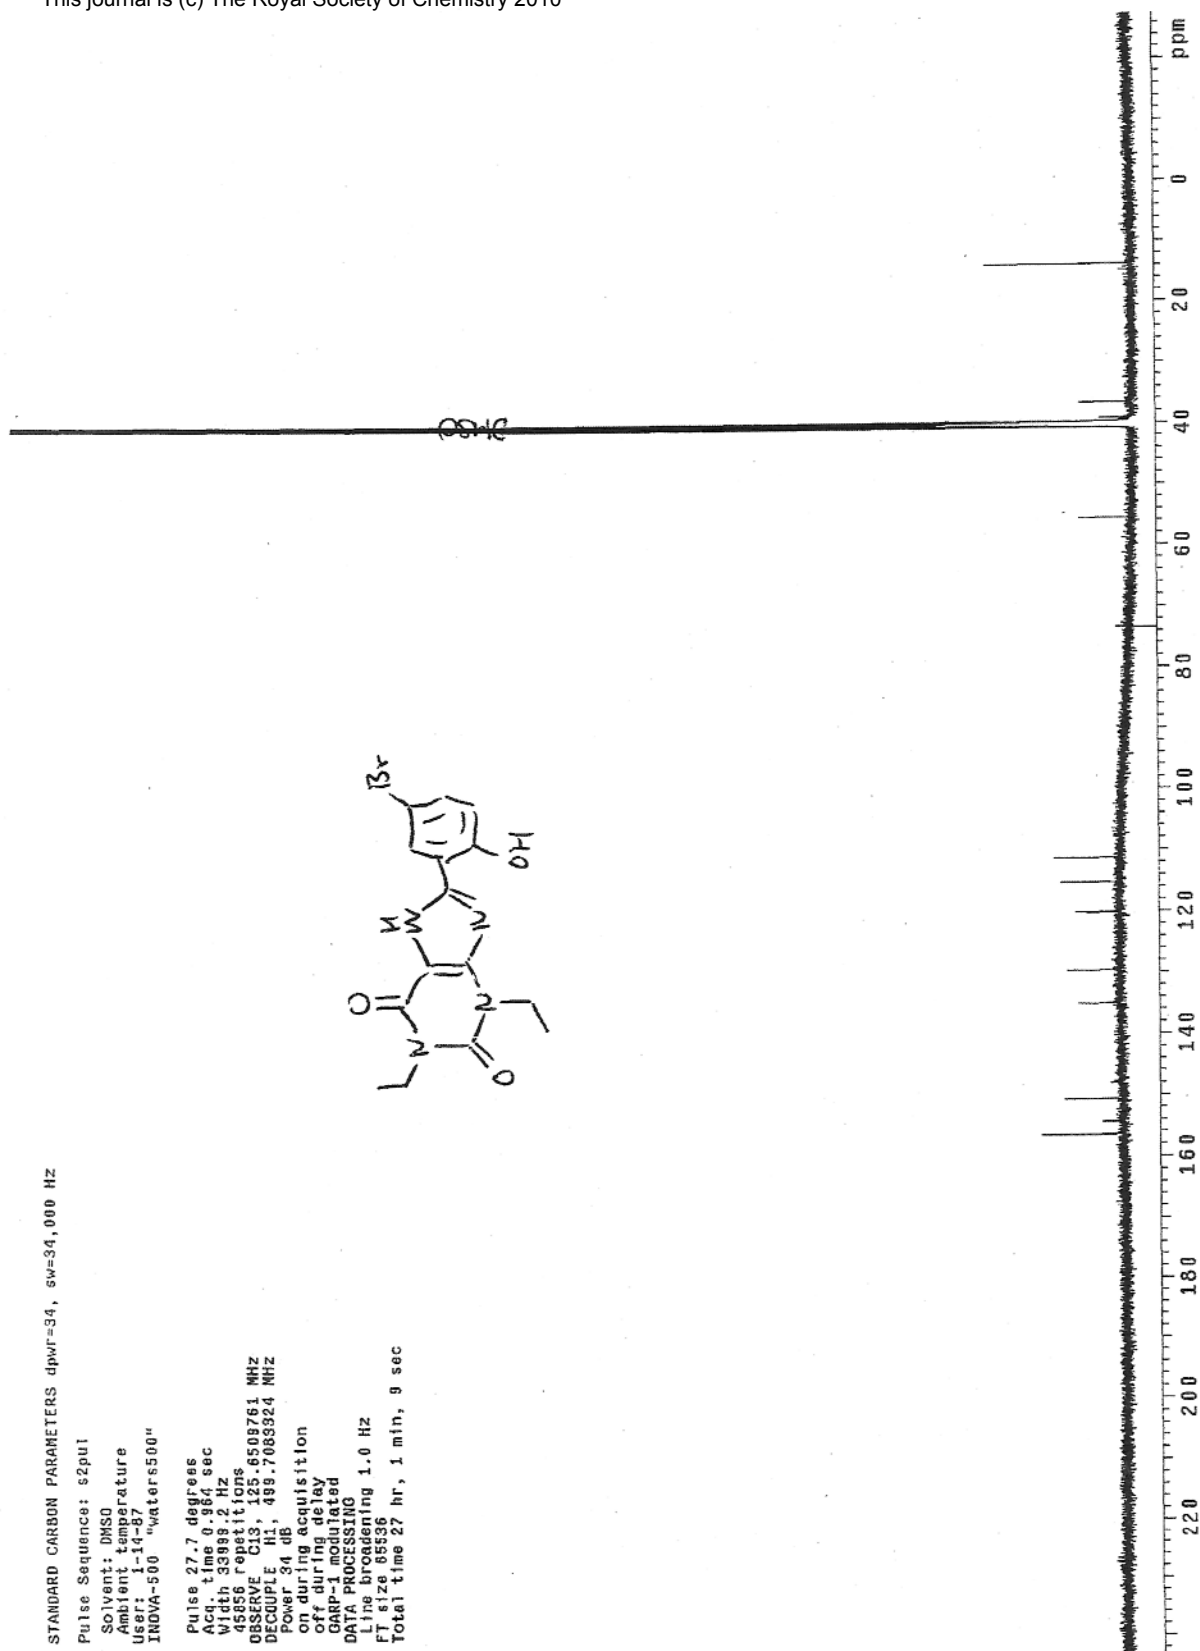

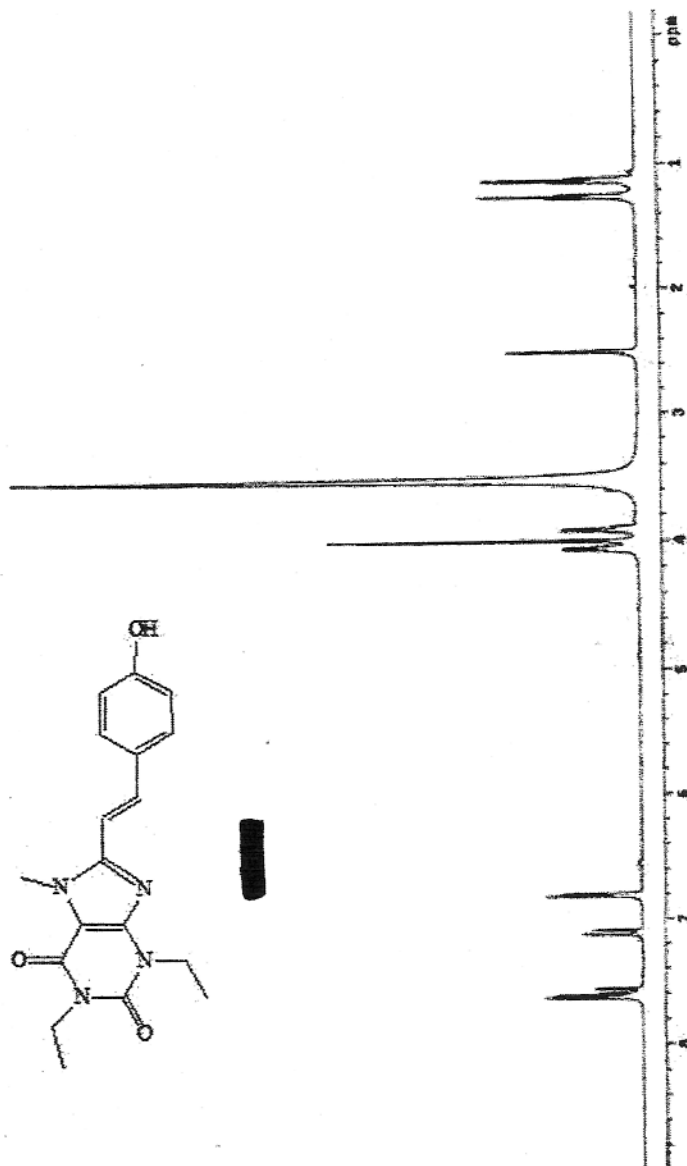

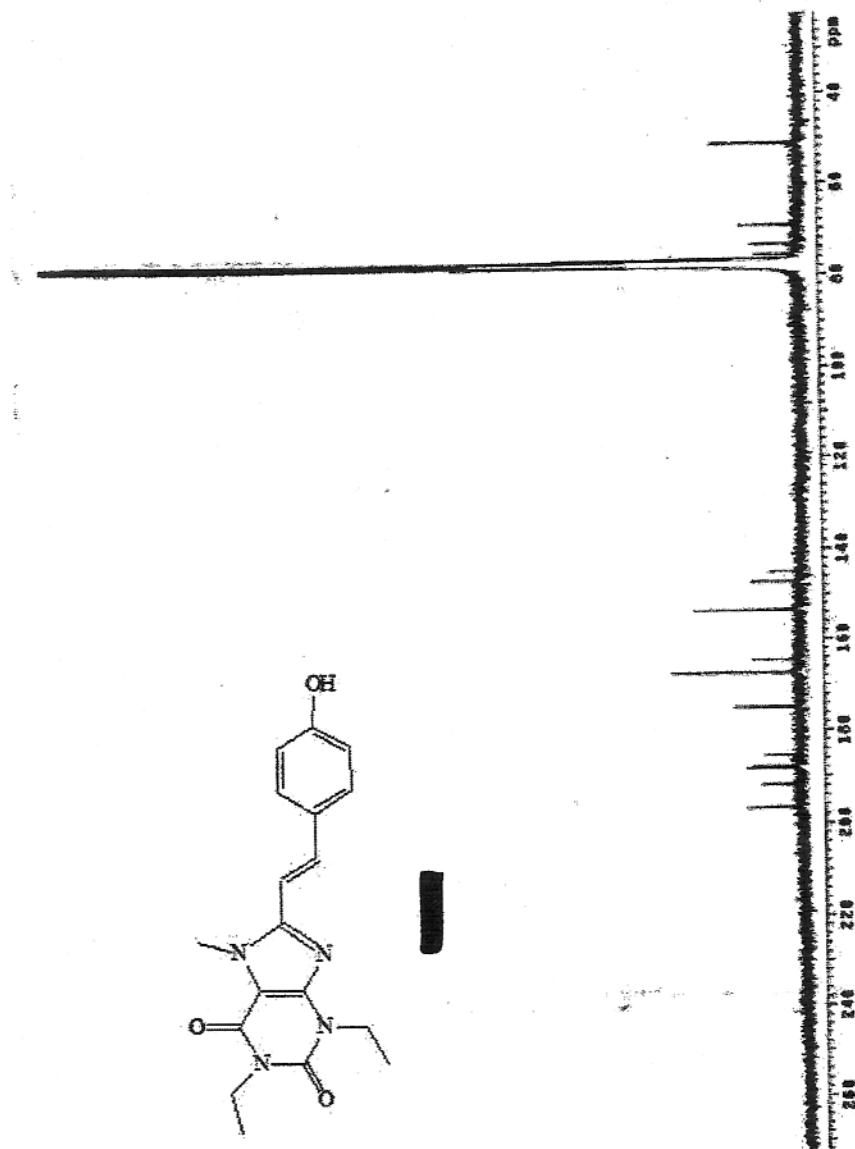

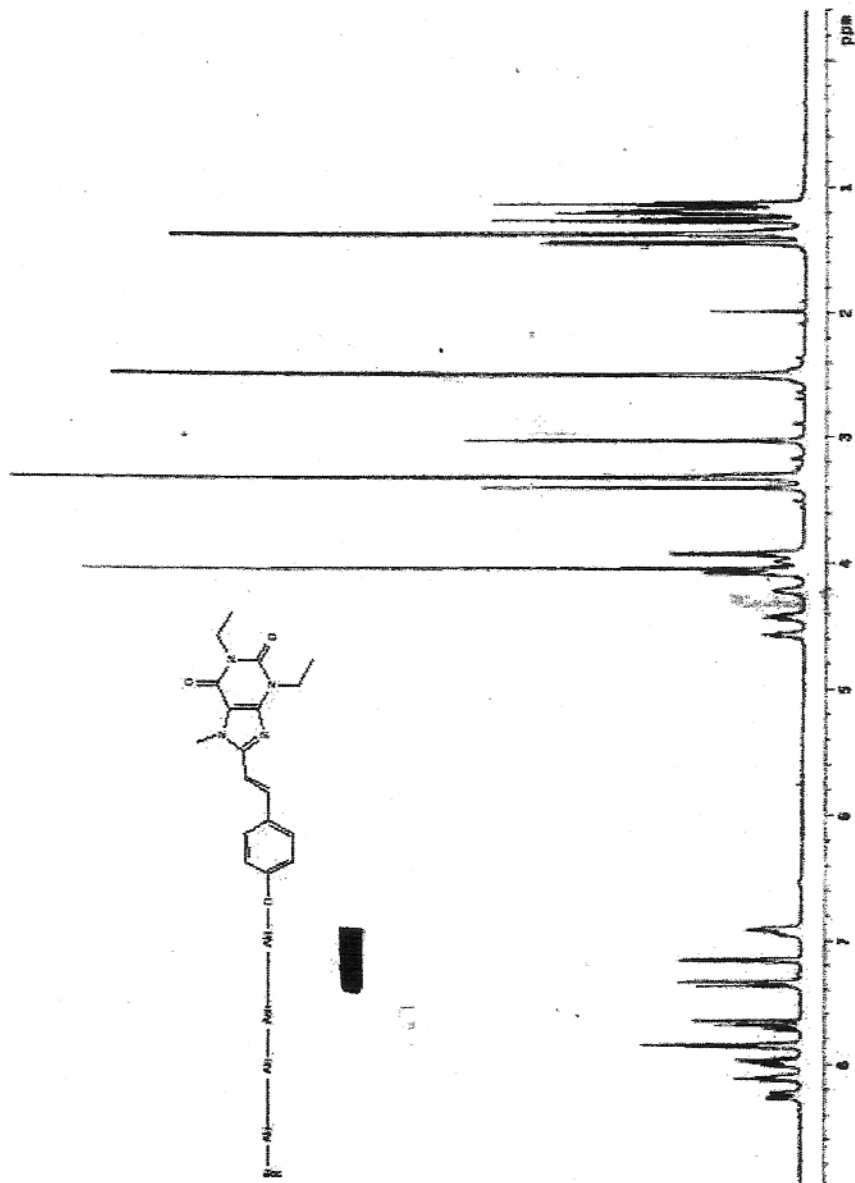

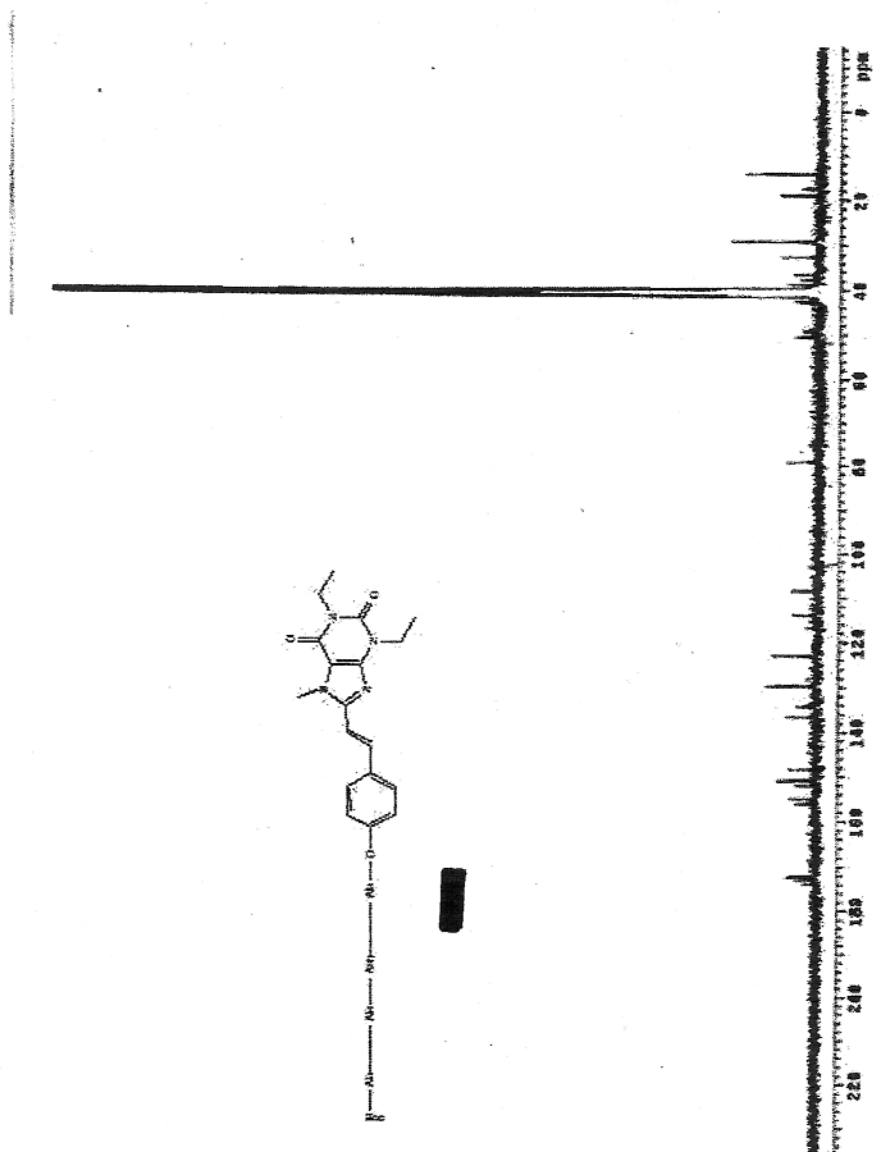



# STANDARD PROTON PARAMETERS

Pulse Sequence: s2pu1  
Solvent: CDCl3  
Ambient temperature  
INNOVA-500 "waters500"  
Pulse 45.0 degrees  
Acq. time 2.048 sec  
Width 8000.0 Hz  
74 repetitions  
OBSERVE H1, 499.7028724 MHz  
DATA PROCESSING  
FT size 32768  
Total time 17 min, 8 sec

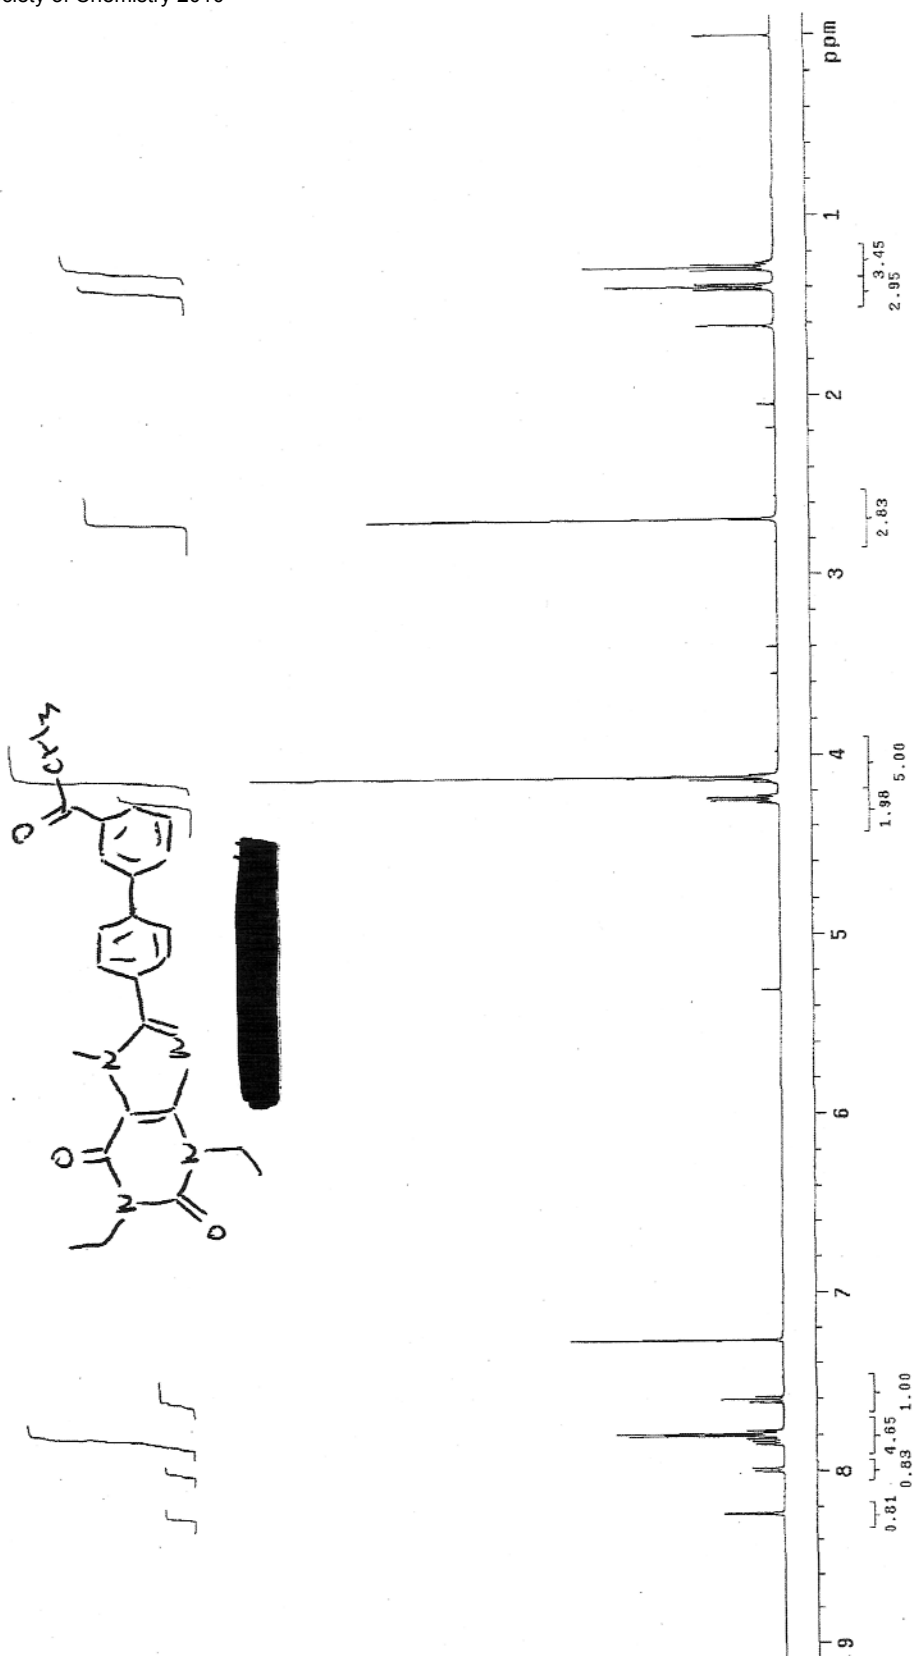

STANDARD CARBON PARAMETERS dpwf=34, sw=34,000 Hz

Pulse Sequence: s2pul

Solvent: CDCl3

Ambient temperature

User: 1-14-87

INOVA-500 "waters500"

Pulse 27.7 degrees

Acq. time 0.964 sec

Width 33988.2 Hz

32000 repetitions

OBSERVE C13, 125.6503838 MHz

DECOUPLE H1, 499.7059588 MHz

Power 34 dB

on during acquisition

off during delay

GARP-1 modulated

DATA PROCESSING

Line broadening 0.1 Hz

FT size 65536

Total time 8 hr, 38 min, 46 sec

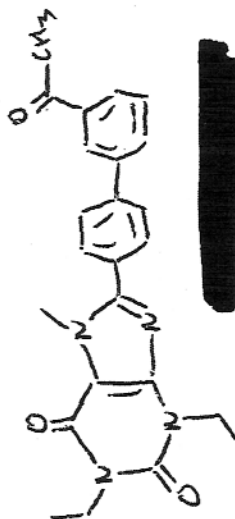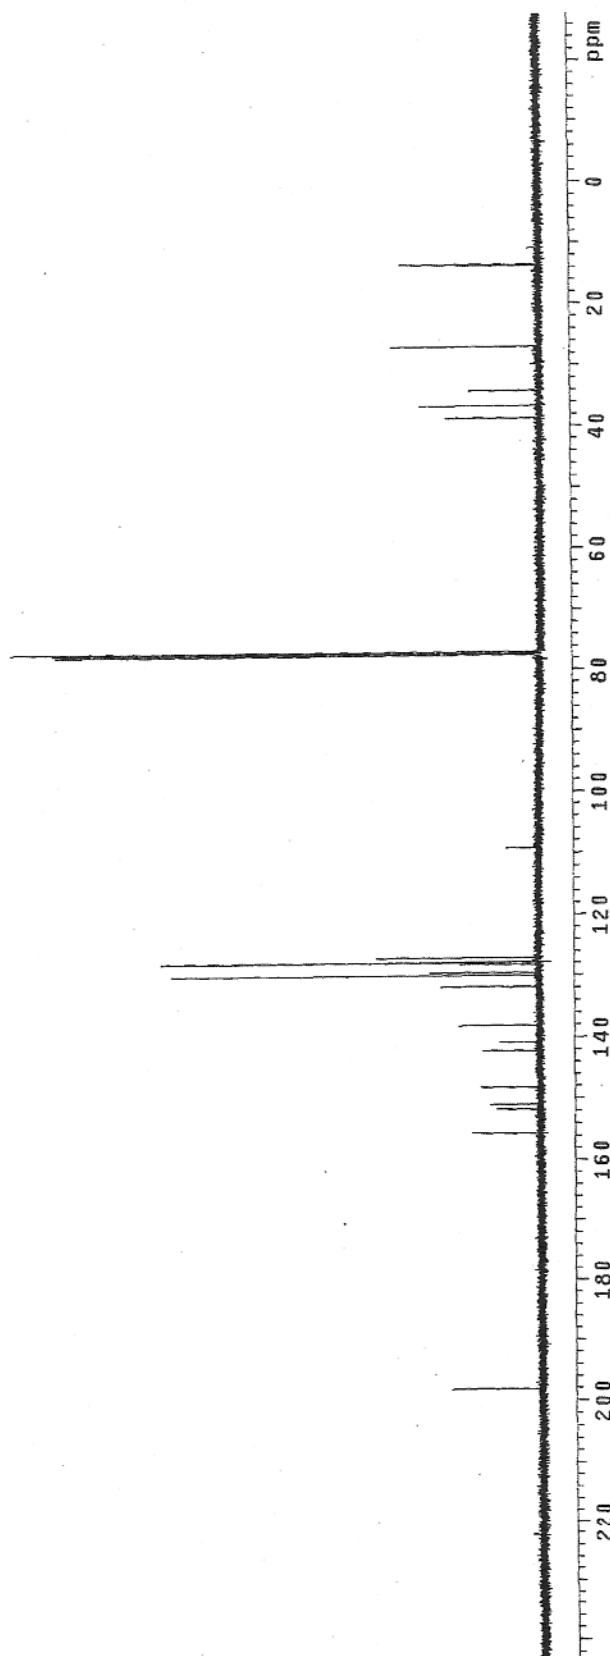

STANDARD PROTON PARAMETERS

Pulse Sequence: s2pul  
Solvent: CDCl<sub>3</sub>  
Ambient temperature  
INNOVA-500 "waters500"  
Pulse 45.0 degrees  
Acq. time 2.048 sec  
Width 8000.0 Hz  
18 repetitions  
OBSERVE H1, 499.7029607 MHz  
DATA PROCESSING  
FT size 32768  
Total time 17 min, 8 sec

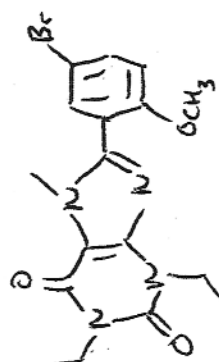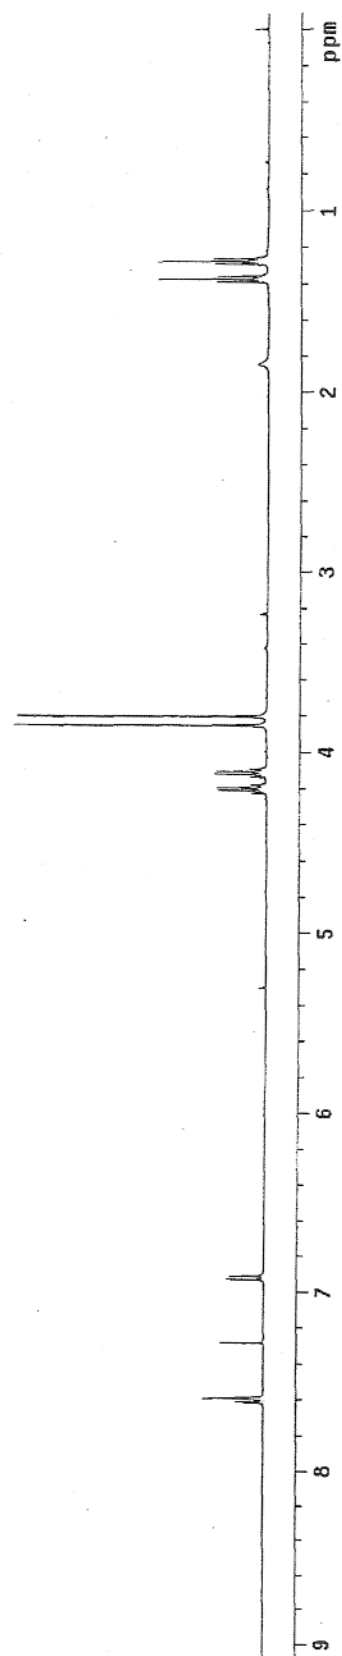

STANDARD CARBON PARAMETERS dpwr=34, sv=34,000 Hz

Pulse Sequence: s2pu1

Solvent: CDCl3

Ambient temperature

User: i-14-B7

INOVA-500 "water500"

Pulse 27.7 degrees

Acq. time 0.964 sec

Width 33999.2 Hz

2736 repetitions

OBSERVE C13, 125.6509979 MHz

DECOUPLE H1, 499.7059566 MHz

Power 34 dB

on during acquisition

off during delay

GAKP-1 modulated

DATA PROCESSING

Line broadening 1.0 Hz

FT size 65536

Total time 2 hr, 42 min, 6 sec

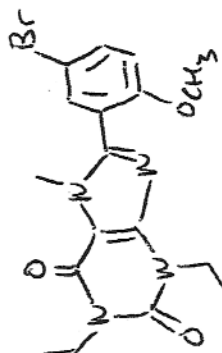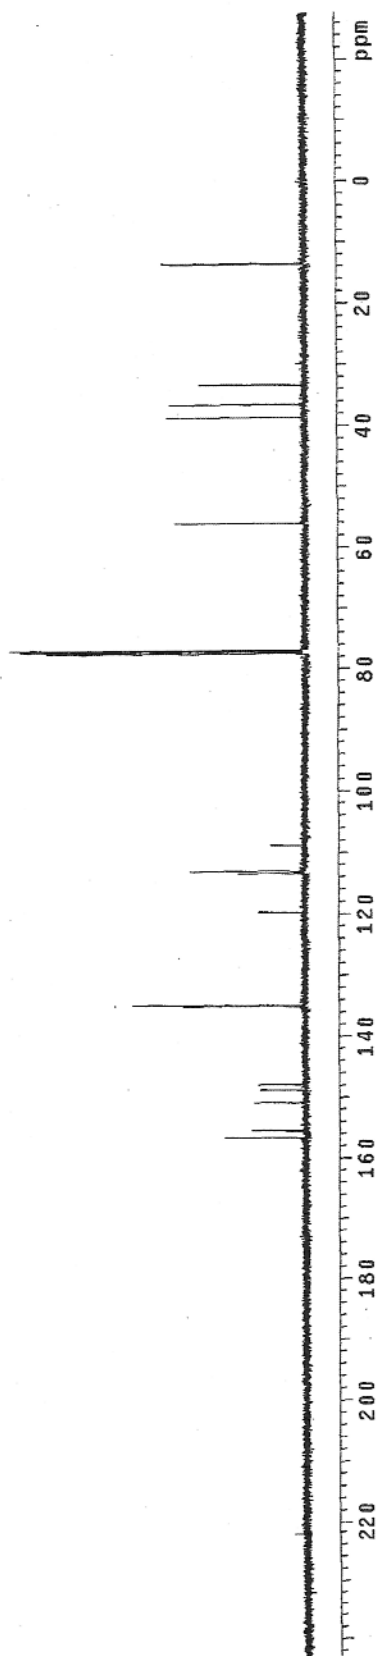

STANDARD PROTON PARAMETERS

Pulse Sequence: s2pul  
Solvent: CDCl<sub>3</sub>  
Ambient temperature  
INNOVA-500 "waters500"  
Pulse 45.0 degrees  
Acq. time 2.048 sec  
Width 8000.0 Hz  
88 repetitions  
OBSERVE H1, 499.7029690 MHz  
DATA PROCESSING  
FT size 32768  
Total time 17 min, 8 sec

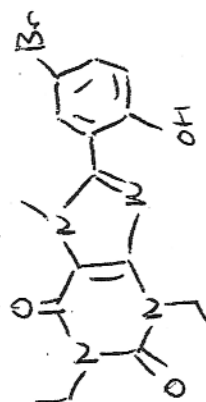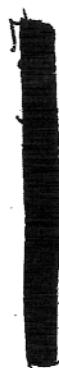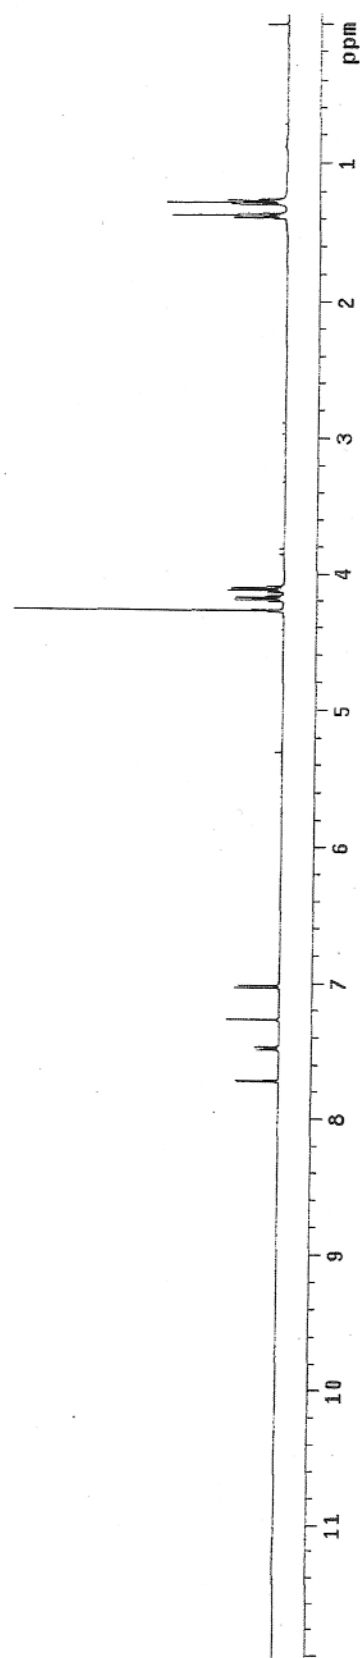

# STANDARD PROTON PARAMETERS

Pulse Sequence: s2pul  
Solvent: CDCl<sub>3</sub>  
Acq. time 2.048 sec  
Width 8000.0 Hz  
56 repetitions  
OBSERVE H1, 499.7029710 MHz  
DATA PROCESSING  
FT size 32768  
Total time 17 min, 8 sec

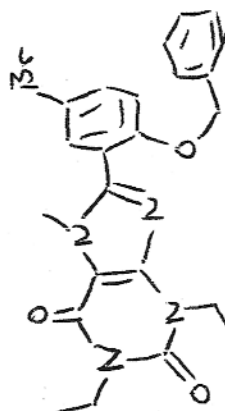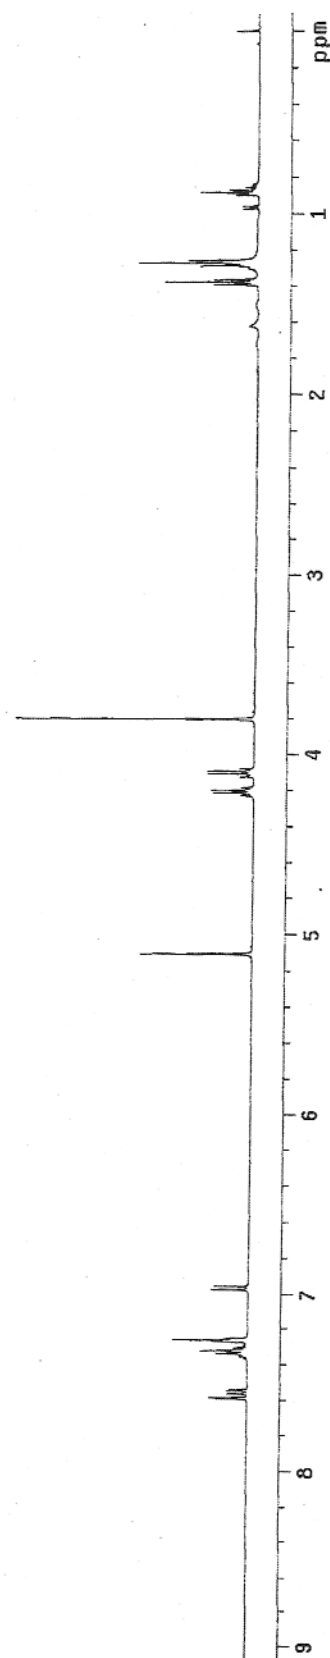

STANDARD CARBON PARAMETERS dpwr=34, sw=34,000 Hz

Pulse Sequence: s2pu1

Solvent: CDCl3

Ambient temperature

UPR: I-14-87

INOVA-500 "waters500"

Pulse 27.7 degrees

Acq. time 0.964 sec

Width 33999.2 Hz

1024 repetitions

OBSERVE C13, 125.6503938 MHz

DECOUPLE H1, 499.7083568 MHz

Power 34 dB

on during acquisition

off during delay

GAP-1 modulated

DATA PROCESSING

Line broadening 1.0 Hz

FT size 65536

Total time 2 hr, 42 min, 6 sec

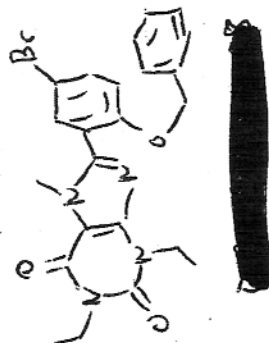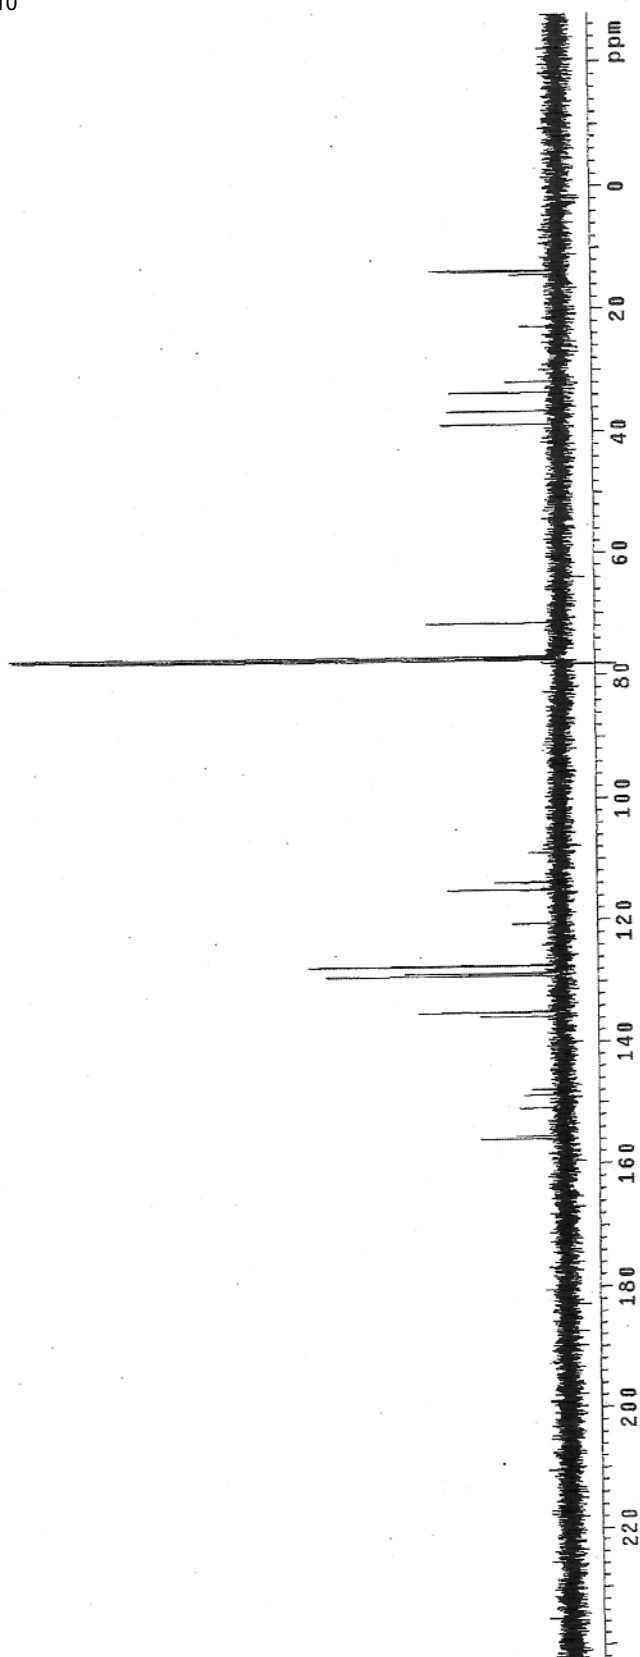

S32

STANDARD PROTON PARAMETERS

Pulse Sequence: s2pul  
Solvent: CDCl<sub>3</sub>  
Ambient temperature  
INOVA-500 "waters500"  
Pulse 45.0 degrees  
Acq. time 2.048 sec  
Width 8000.0 Hz  
98 repetitions  
OBSERVE H1, 499.7029671 MHz  
DATA PROCESSING  
FT size 32768  
Total time 17 min, 8 sec

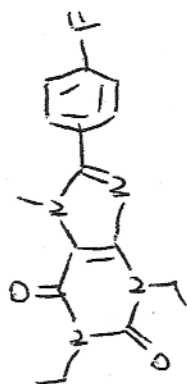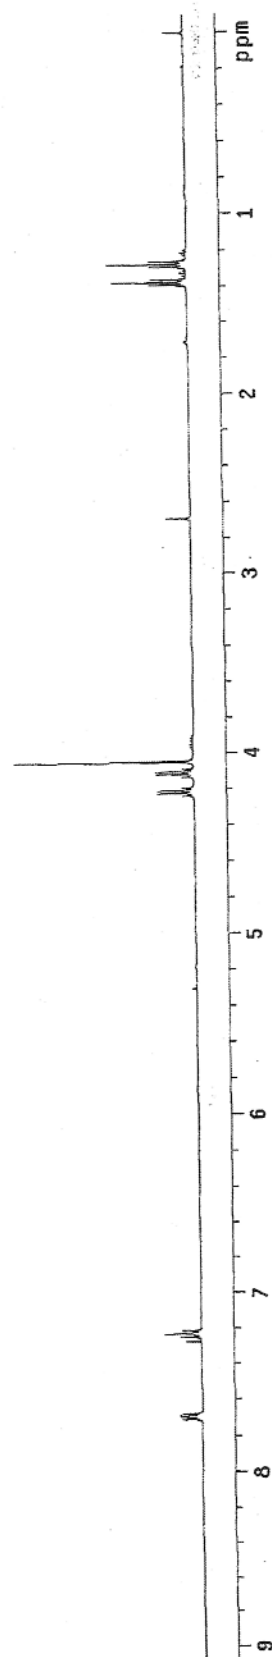



STANDARD CARBON PARAMETERS dpwr=34, sw=34,000 Hz

Pulse Sequence: s2pul

Solvent: CDCl<sub>3</sub>

Ambient temperature

User: 1-14-87

INOVA-500 "waters500"

Pulse 27.7 degrees

Acq. time 0.864 sec

Width 33399.2 Hz

1056 repetitions

OBSERVE C13, 125.650348 MHz

DECOUPLE H1, 499.7059588 MHz

Power 34 dB

on during acquisition

off during delay

GARP-1 modulated

DATA PROCESSING

Line broadening 1.0 Hz

FT size 65536

Total time 13 hr, 30 min, 34 sec

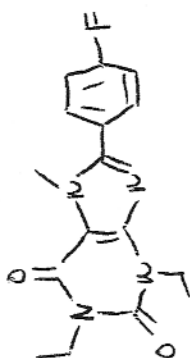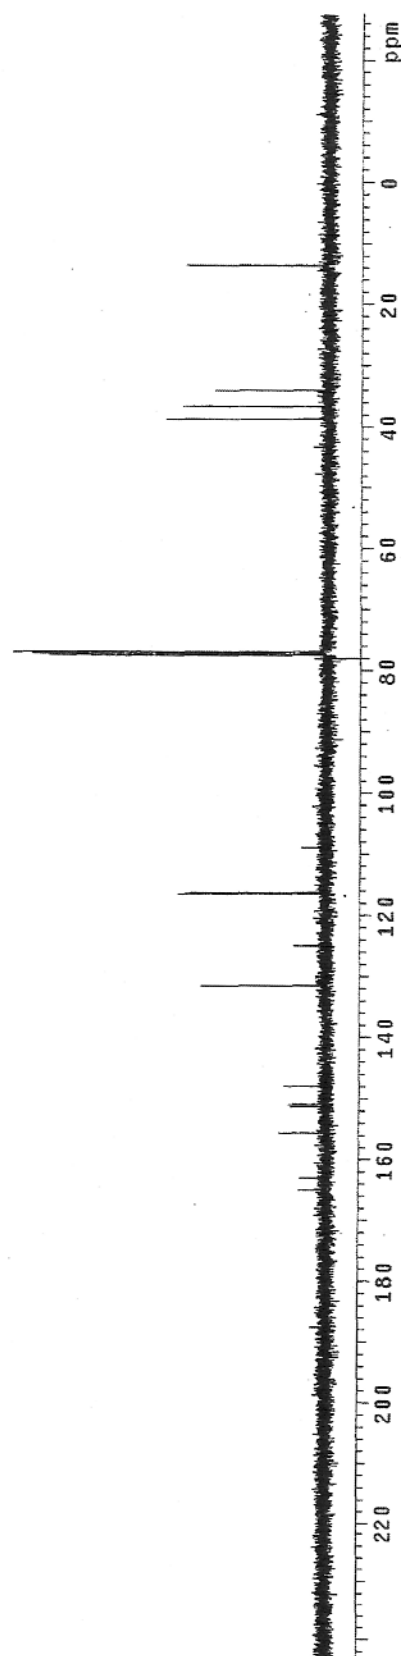

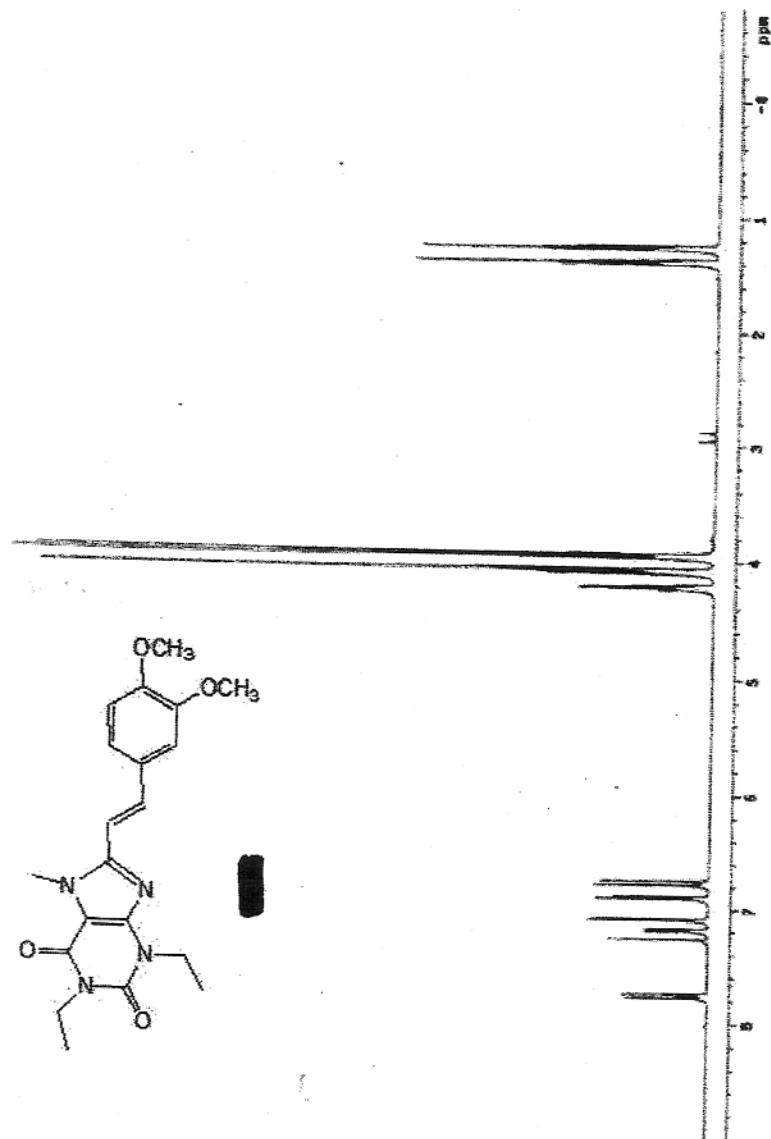

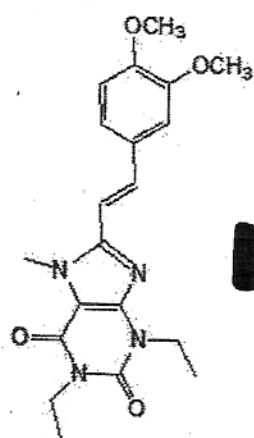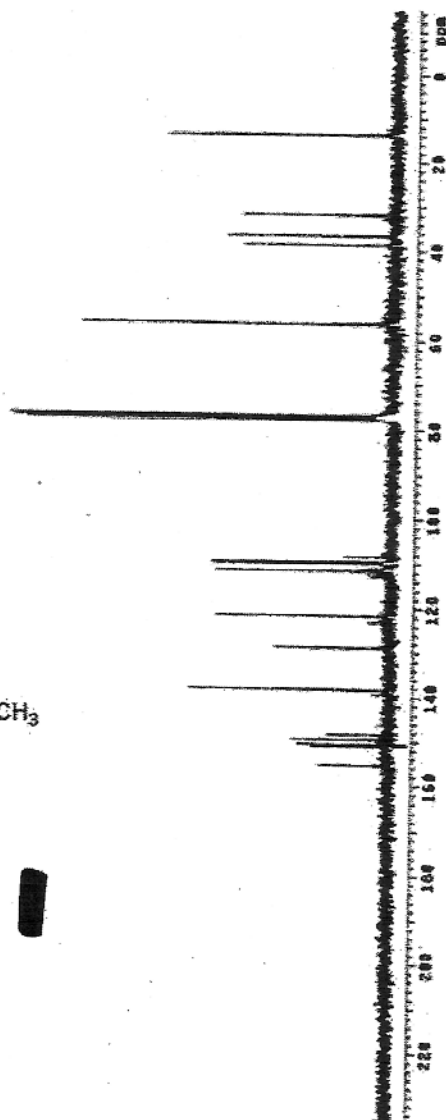

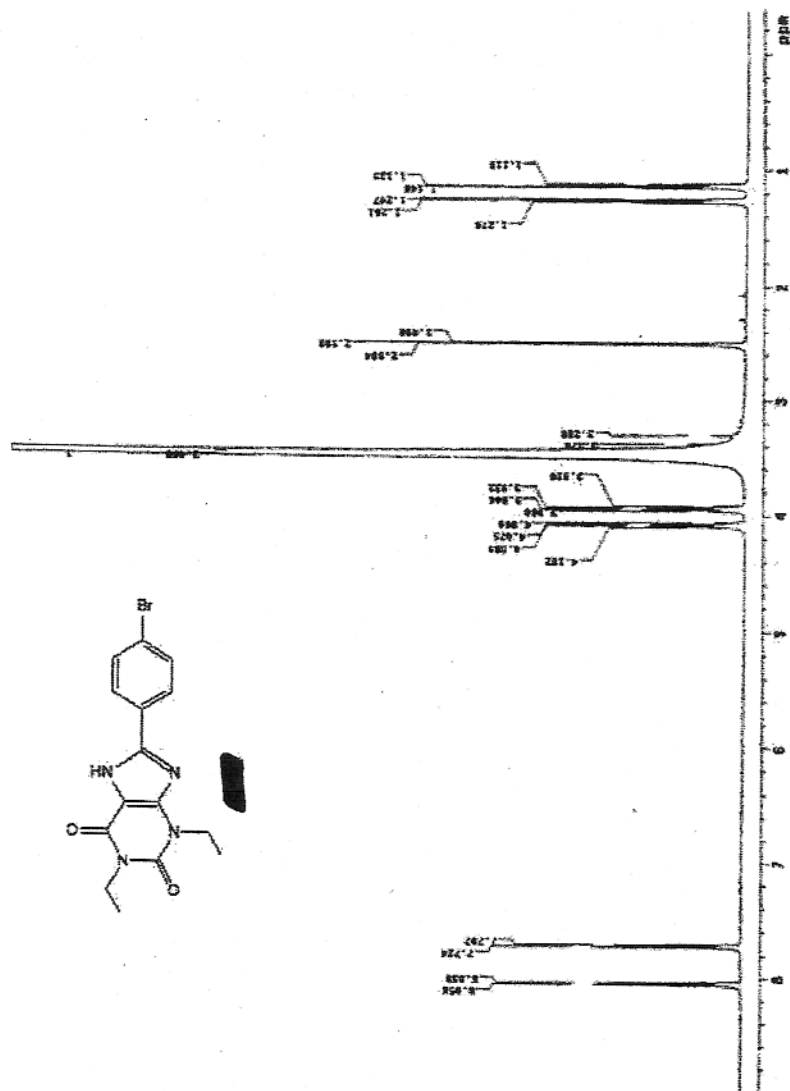

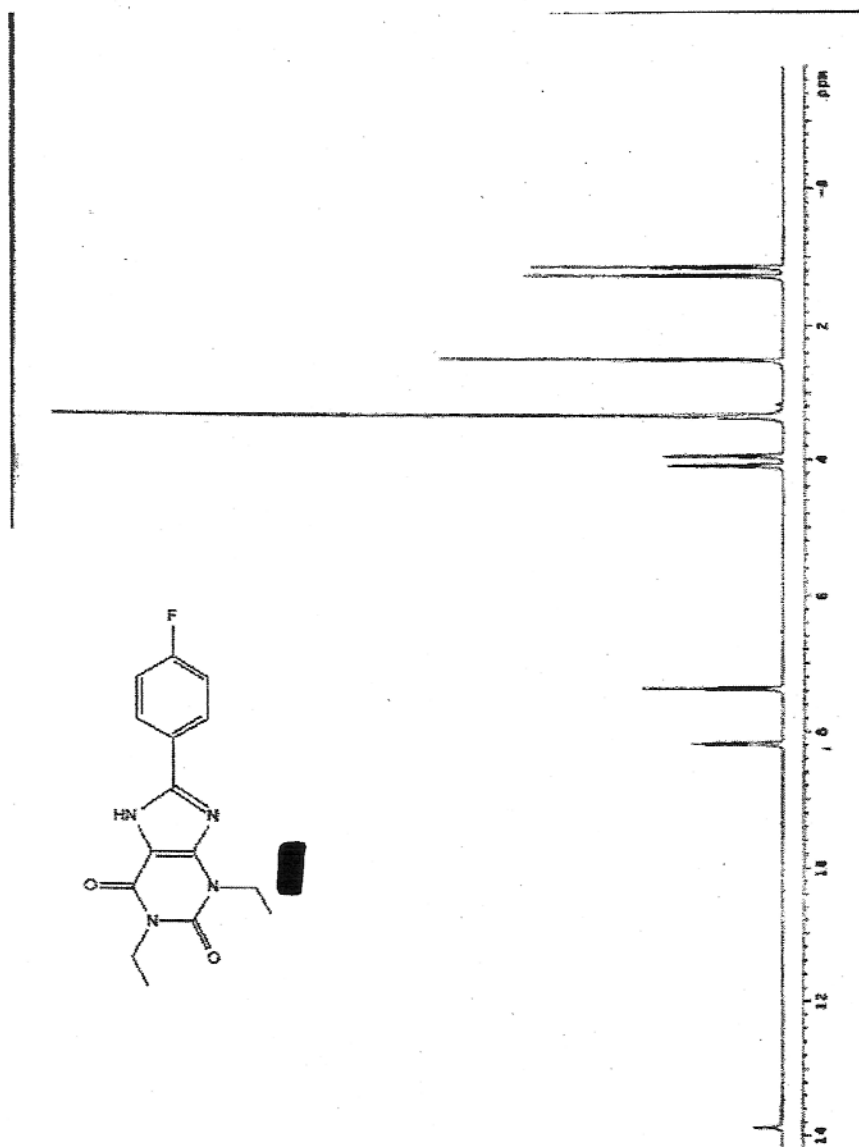

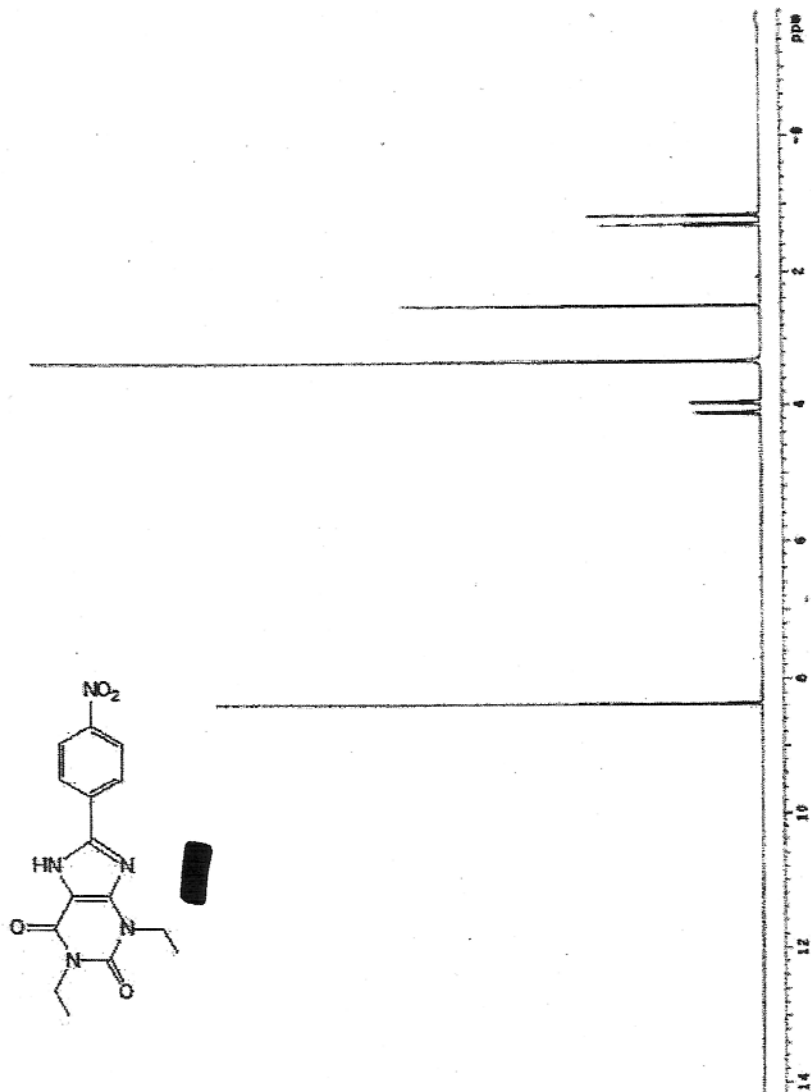

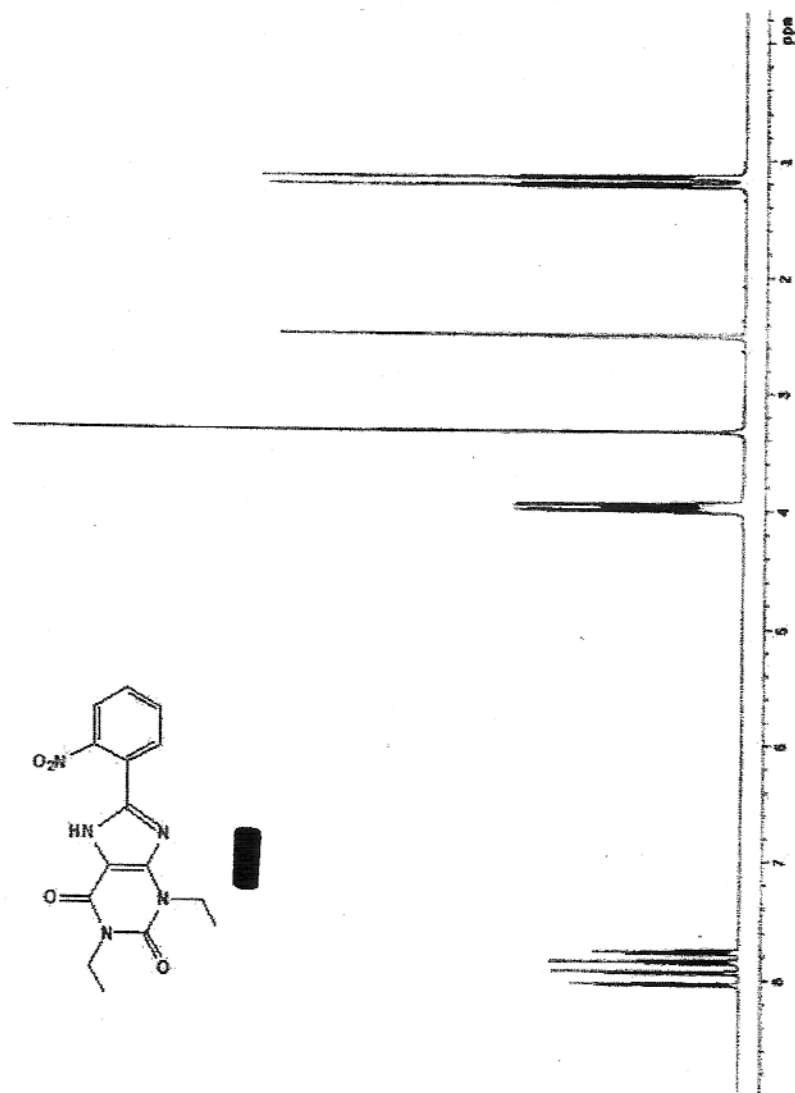

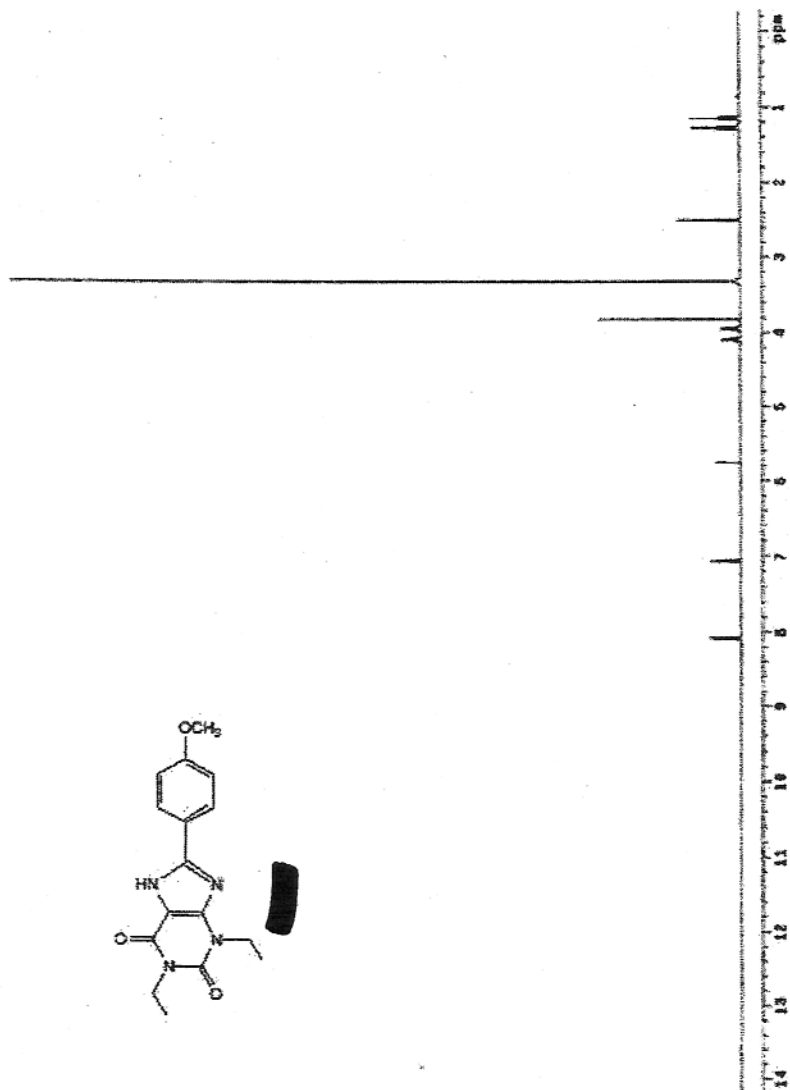



S41

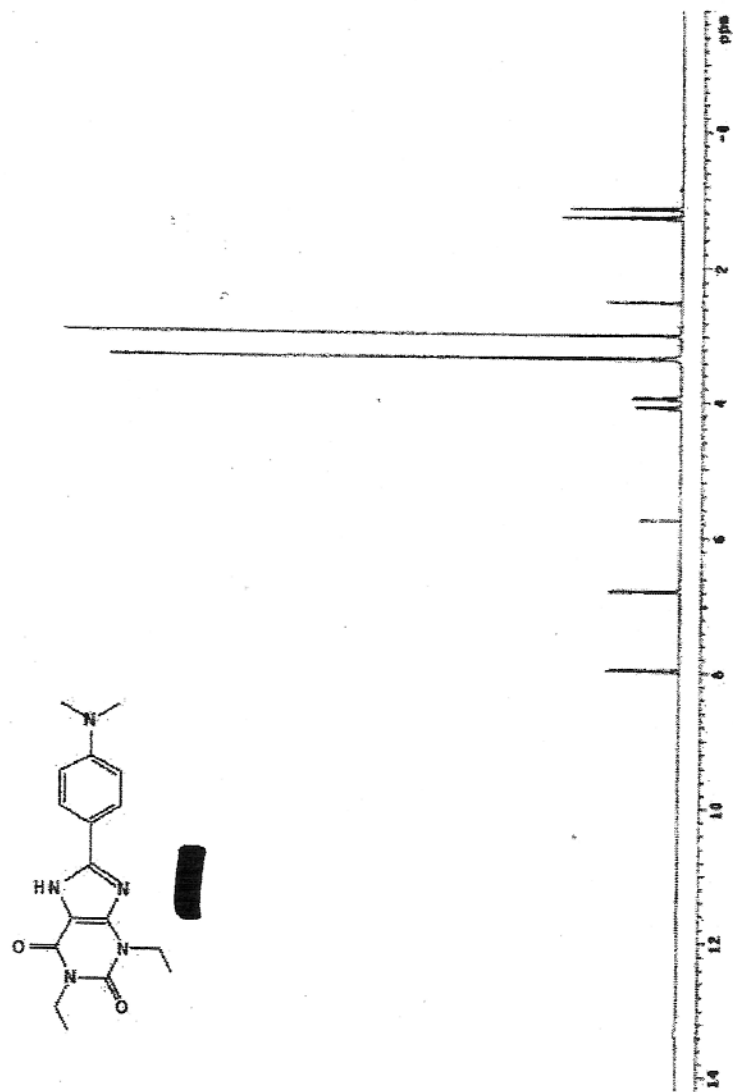

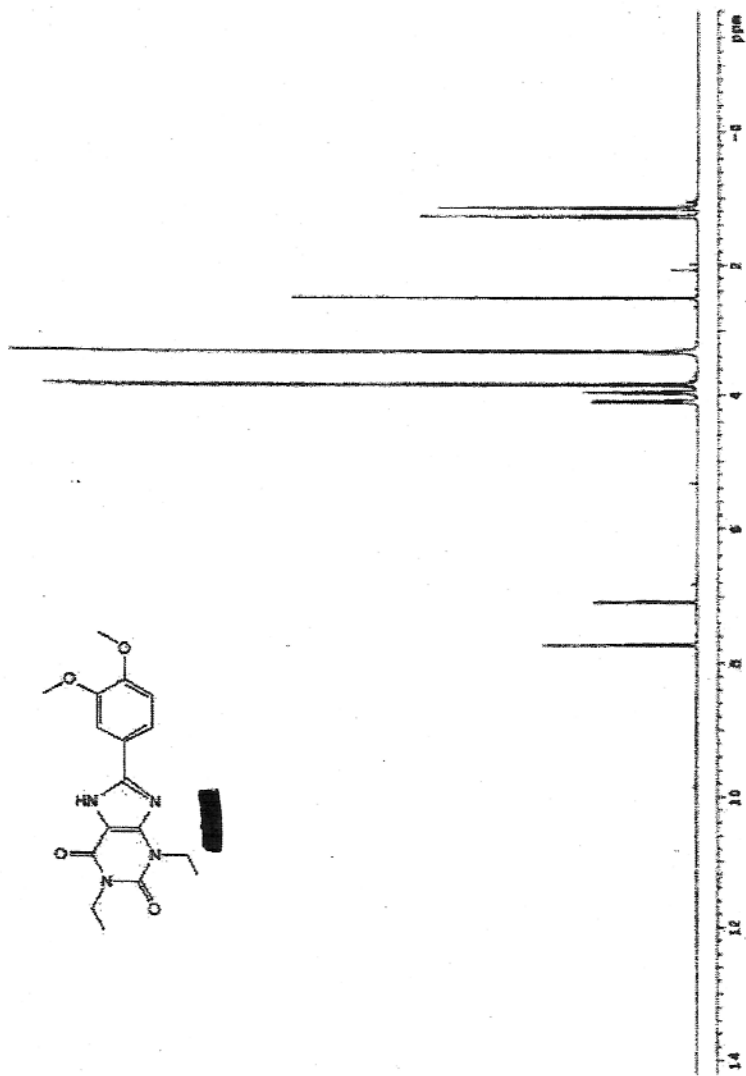

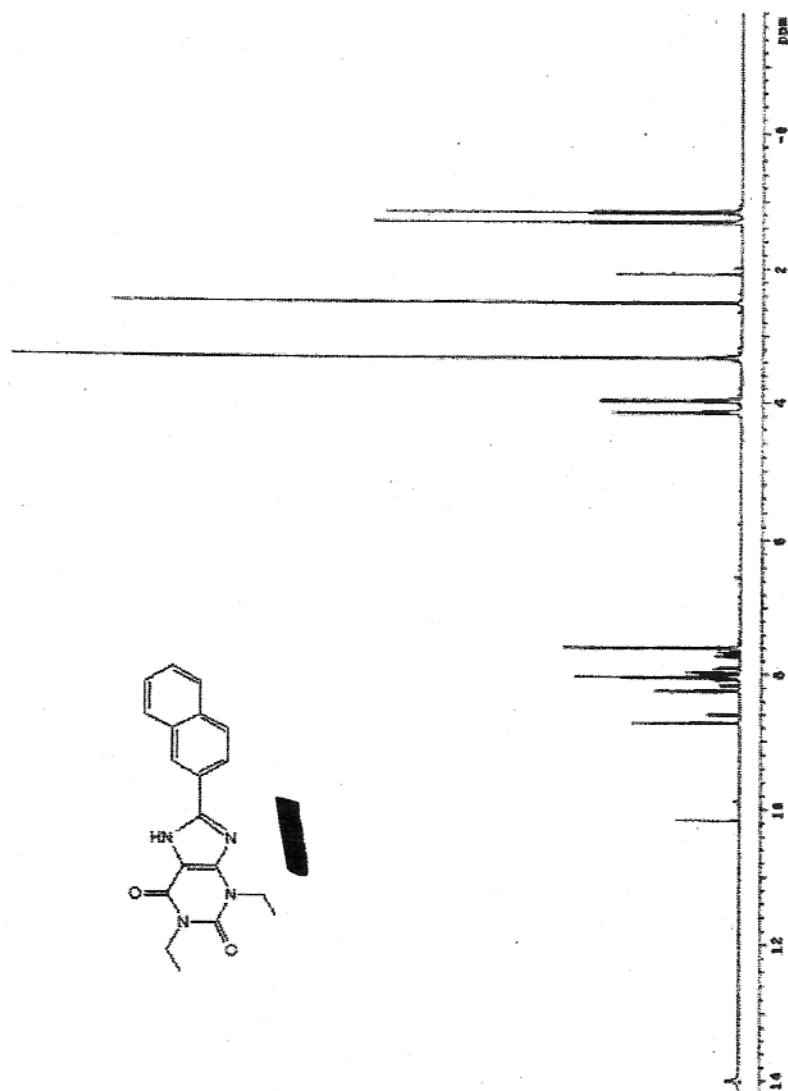

S44

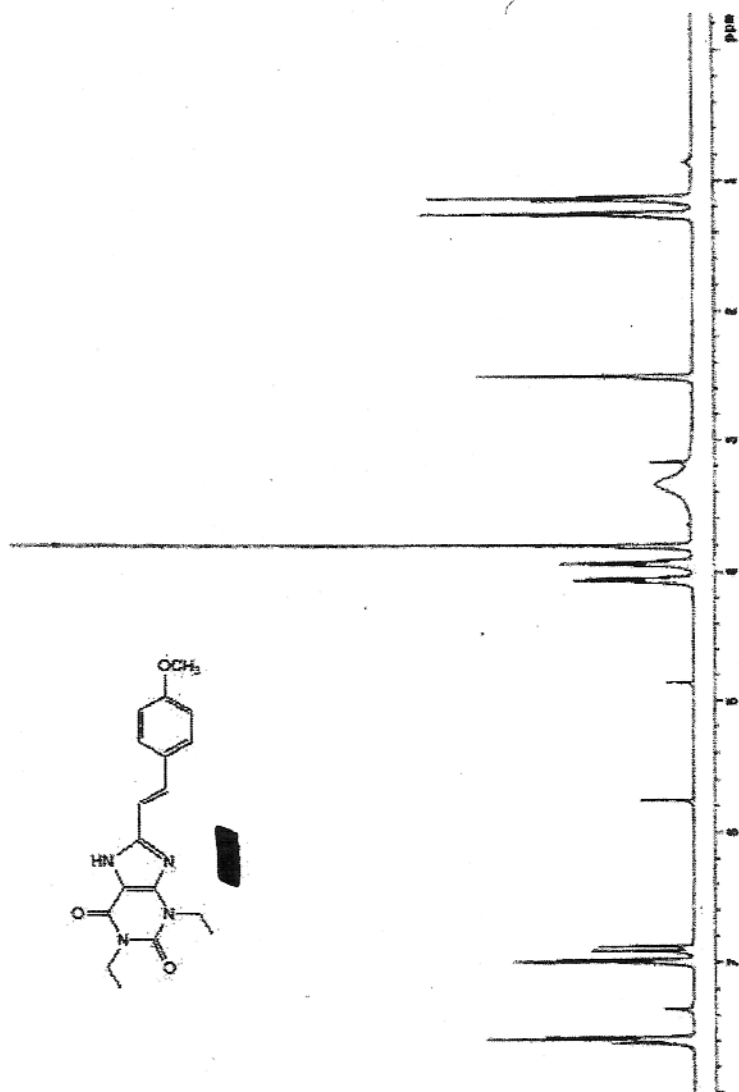

S45

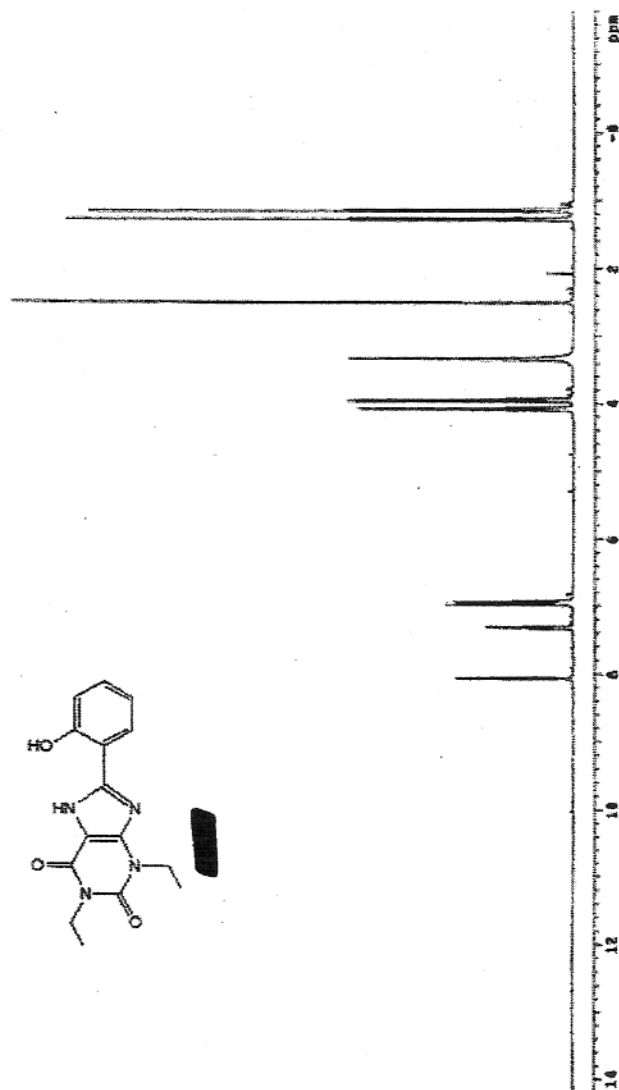

RT-37

Pulse Sequence: s2pul

Solvent: DMSO

Ambient temperature

Mercury-400BB "nmr-400"

Relax. delay 1.000 sec

Pulse 34.6 degrees

Acq. time 1.931 sec

Width 7507.5 Hz

128 repetitions

OBSERVE H1, 400.1622959 MHz

DATA PROCESSING

FT size 32768

Total time 6 min, 42 sec

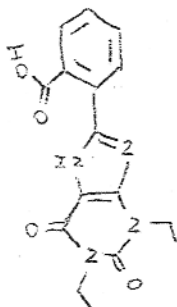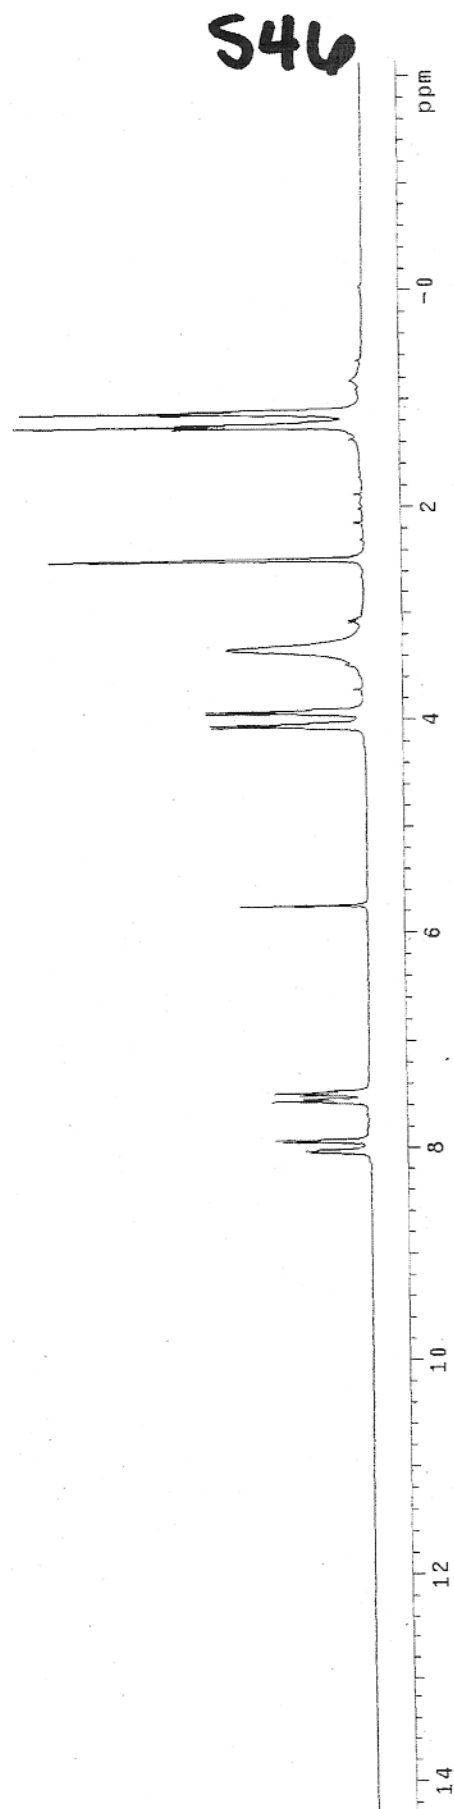

S47

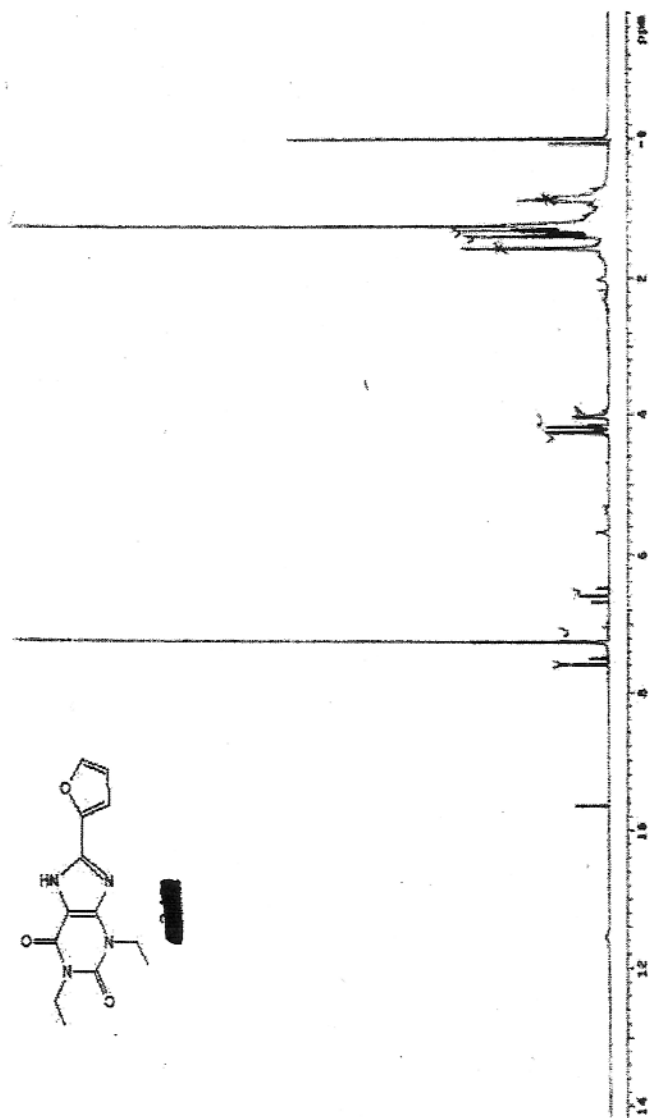

548

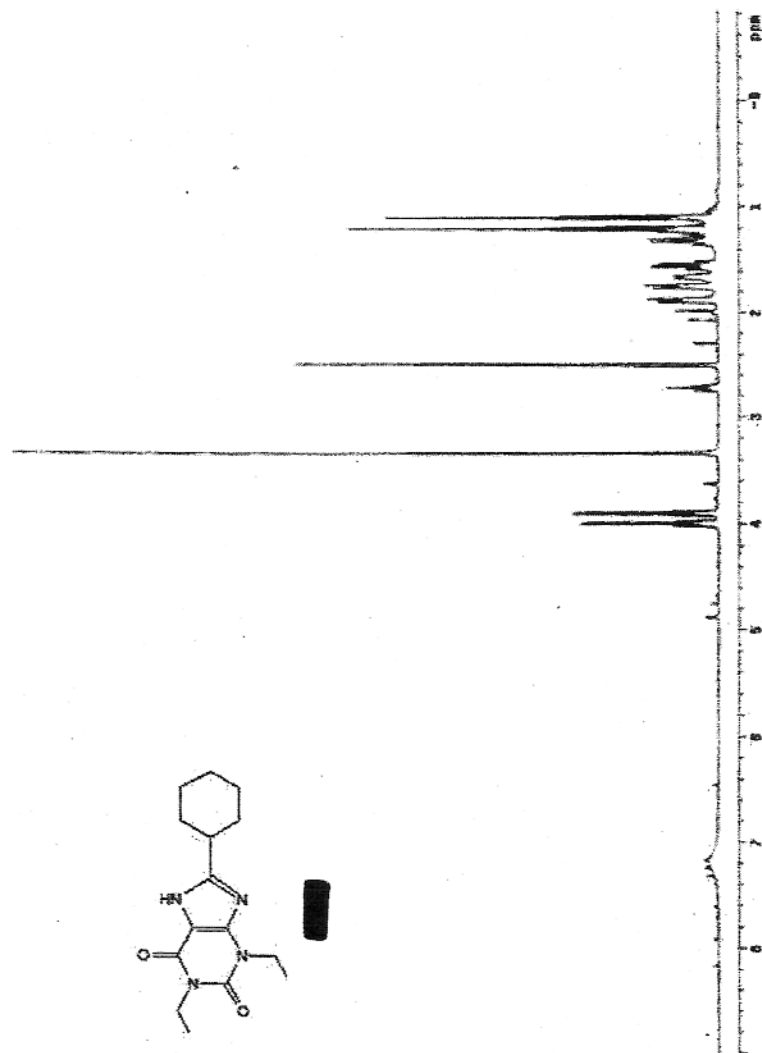



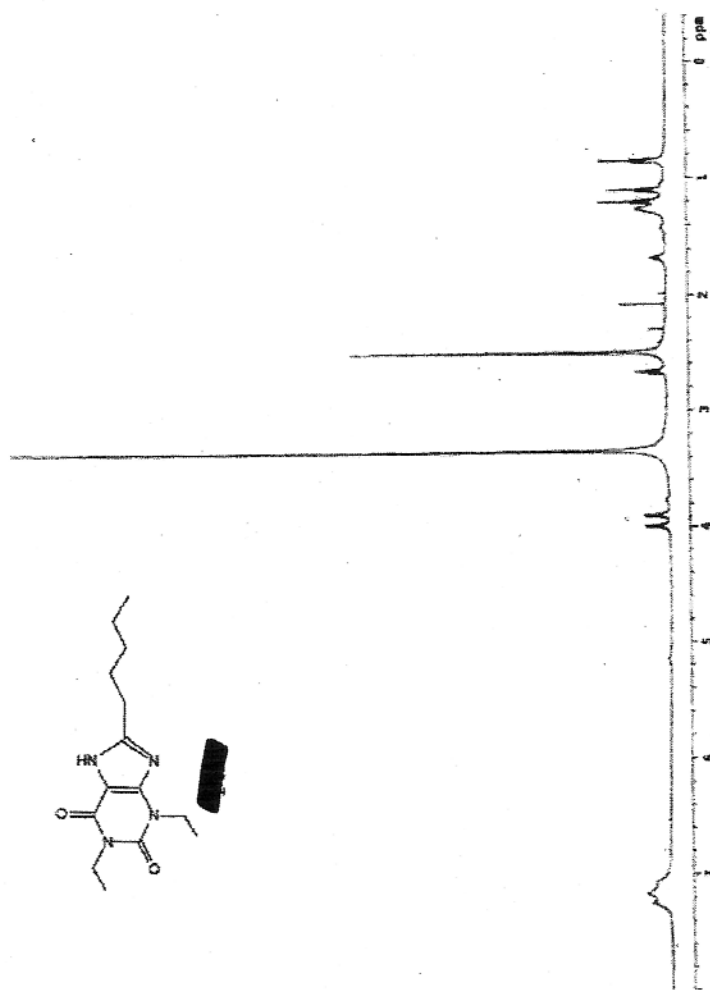

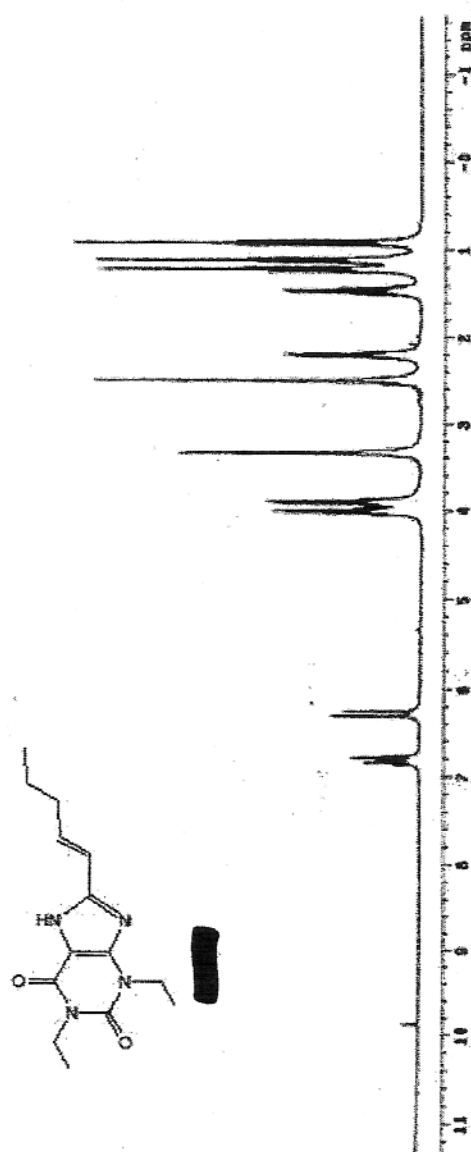

HT-4-45  
N-bromopropane-N-Boc-piperazine  
CDC13

Pulse Sequence: s2pu1  
Solvent: CDC13  
Ambient temperature  
INNOVA-500 "waters500"

Pulse 45.0 degrees  
Acq time 2.048 sec  
Width 8000.0 Hz  
118 repetitions  
OBSERVE H1 499.7127411 MHZ  
DATA PROCESSING  
FT size 32768  
Total time 4 min, 2 sec

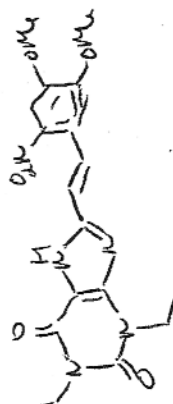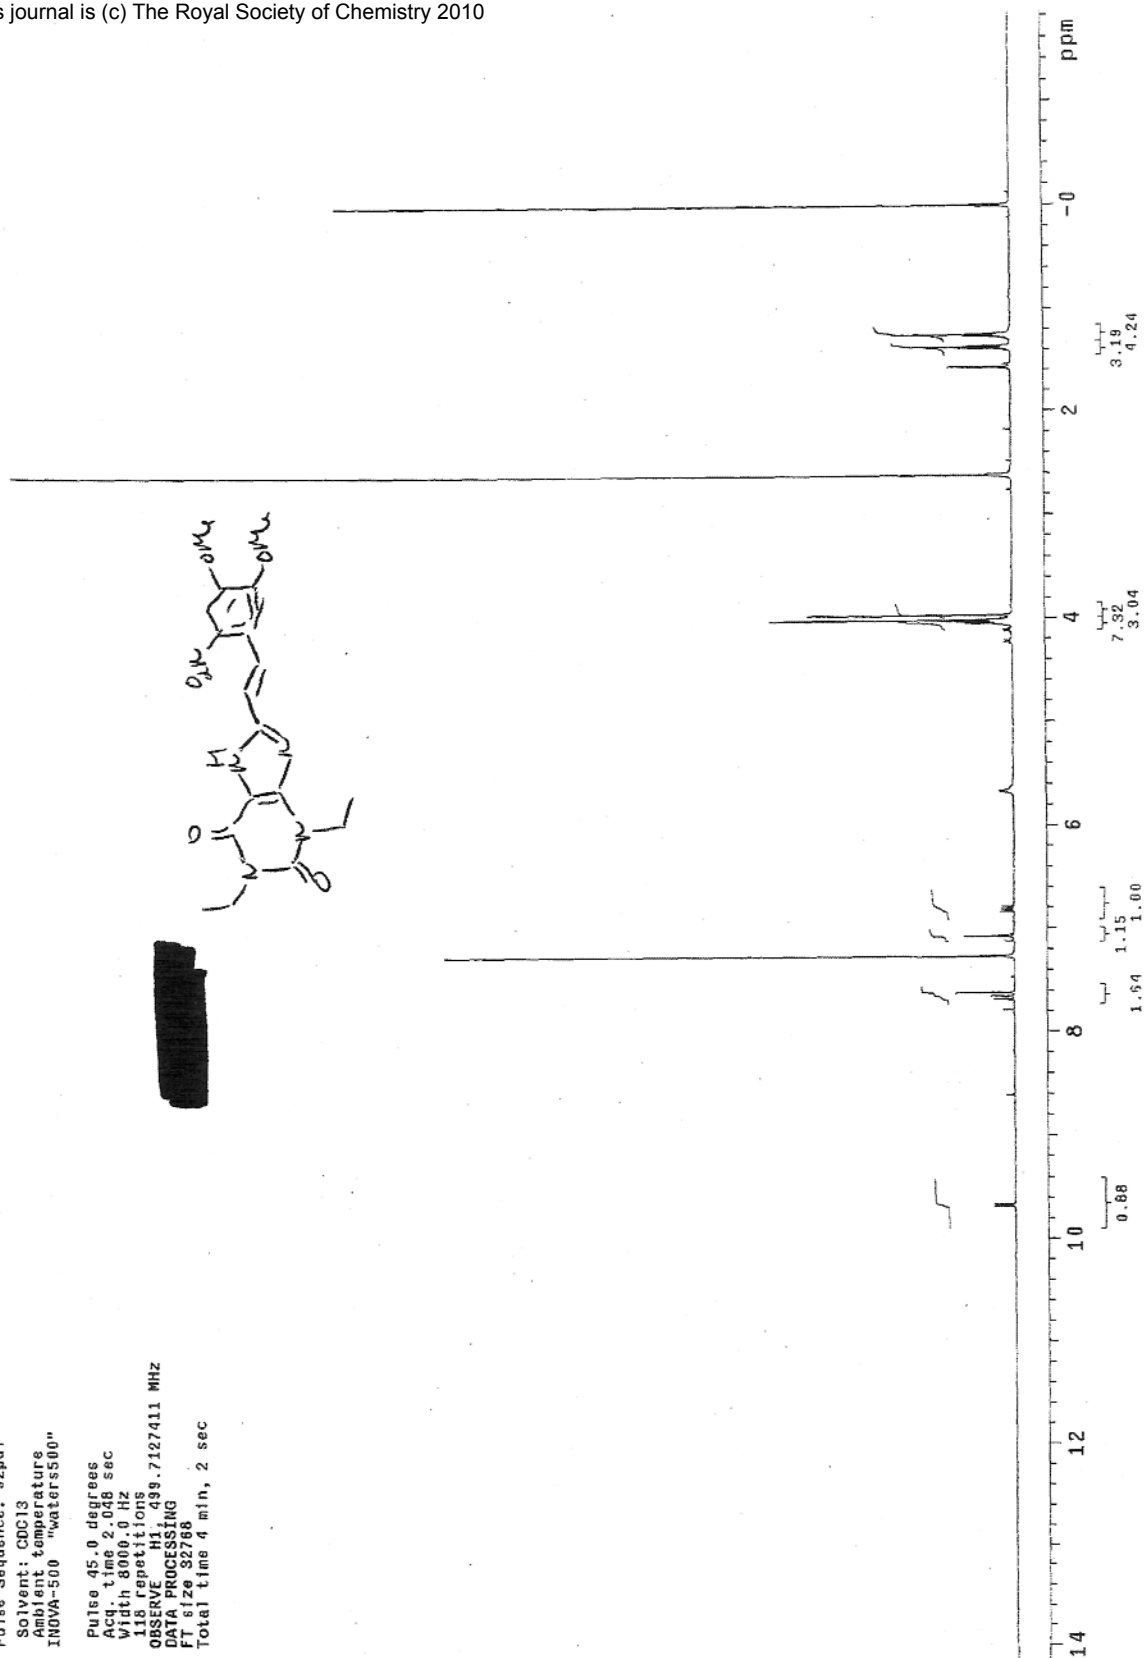

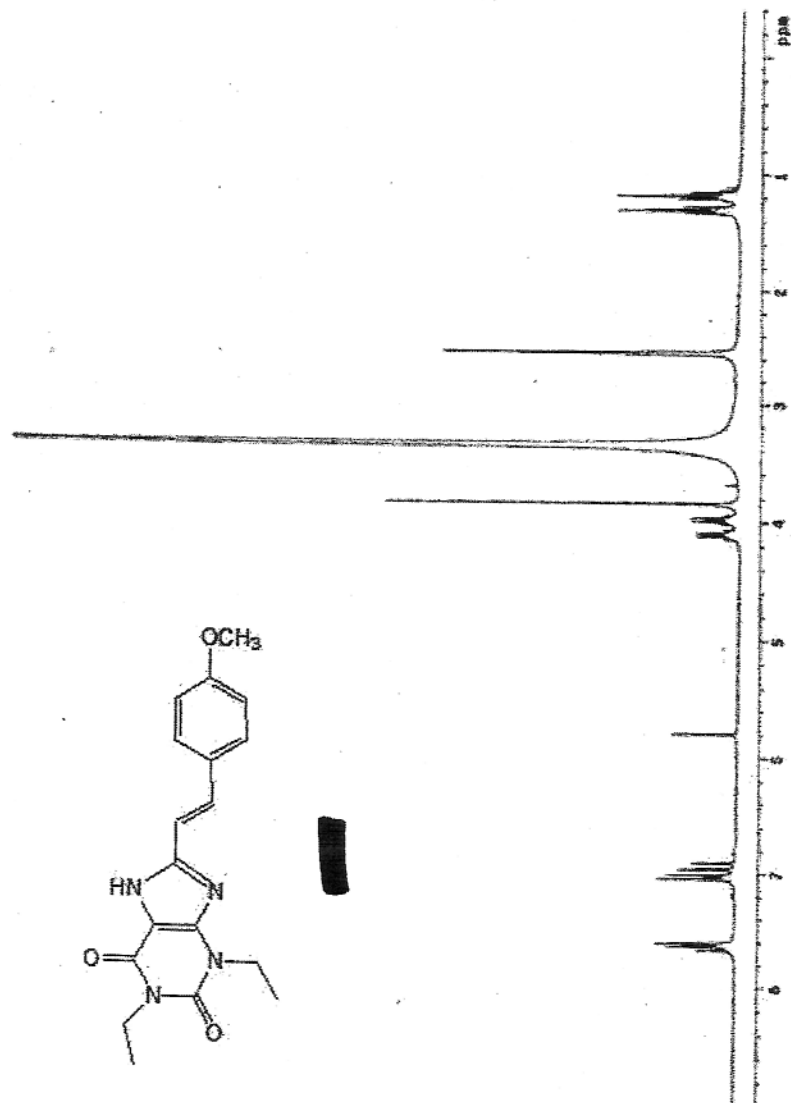

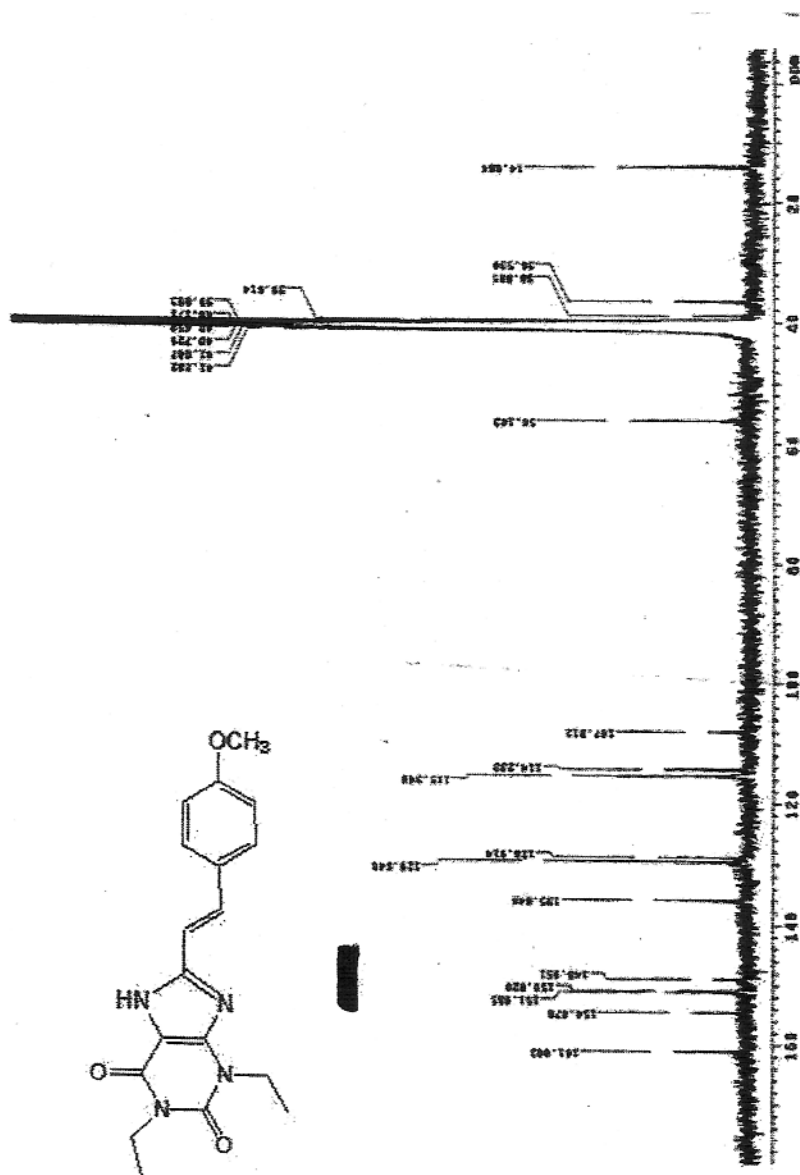

S54

STANDARD PROTON PARAMETERS

Pulse Sequence: s2pul  
Solvent: CDCl<sub>3</sub>  
Ambient temperature  
INOVA-500 "waters500"  
  
Relax. delay 2.000 sec  
Pulse 45.0 degrees  
Acq. time 2.048 sec  
Width 8000.0 Hz  
60 repetitions  
OBSERVE F1: 499.7127362 MHz  
DATA PROCESSING  
F1 size 32768  
Total time 4 min, 3 sec

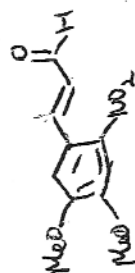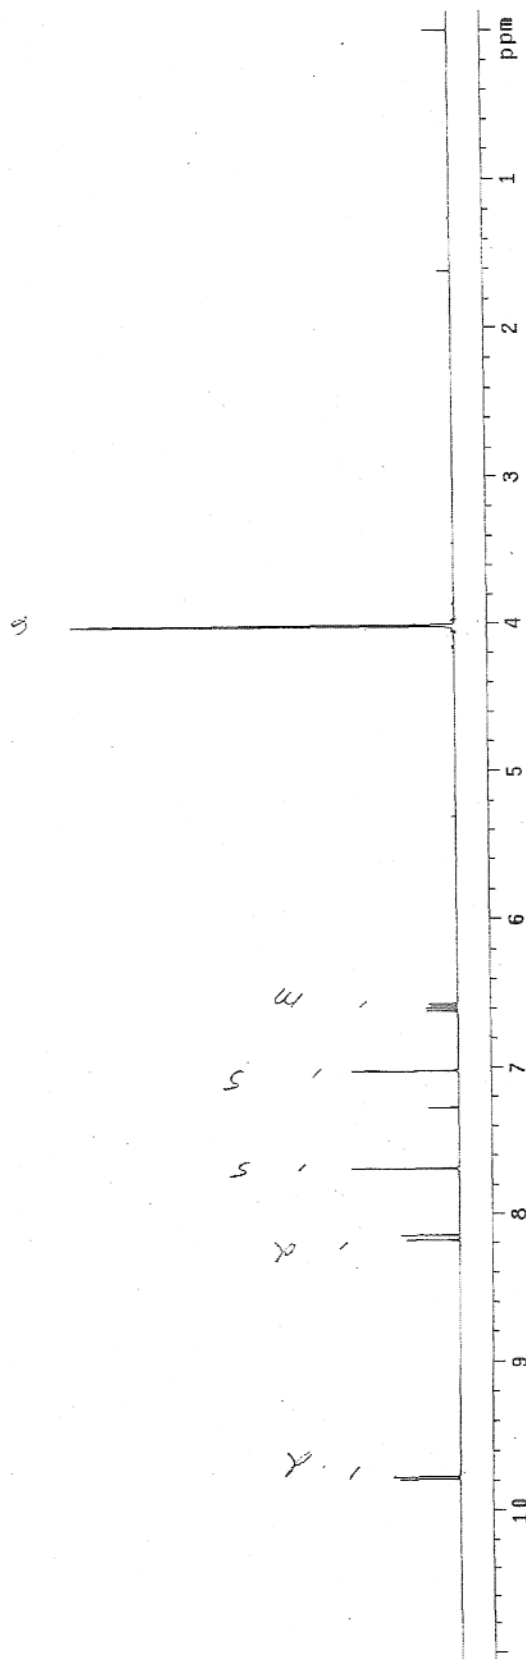

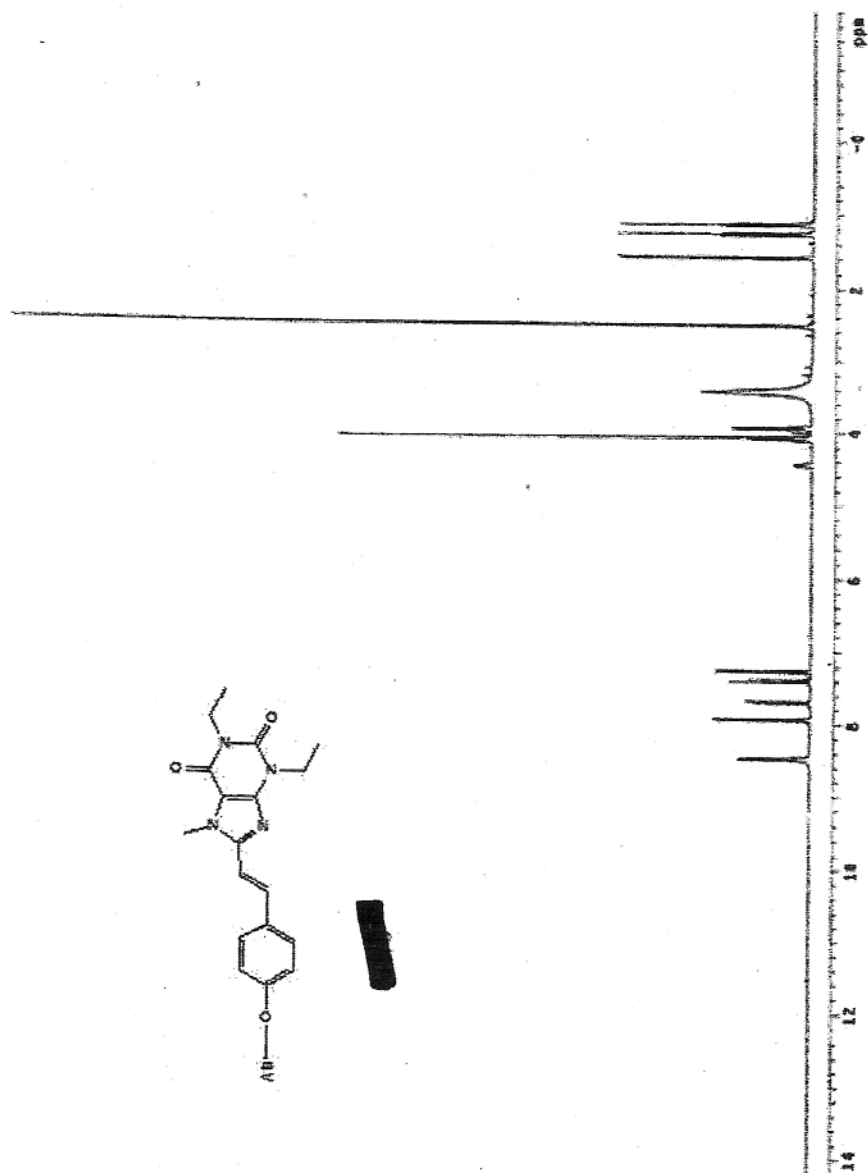

S56

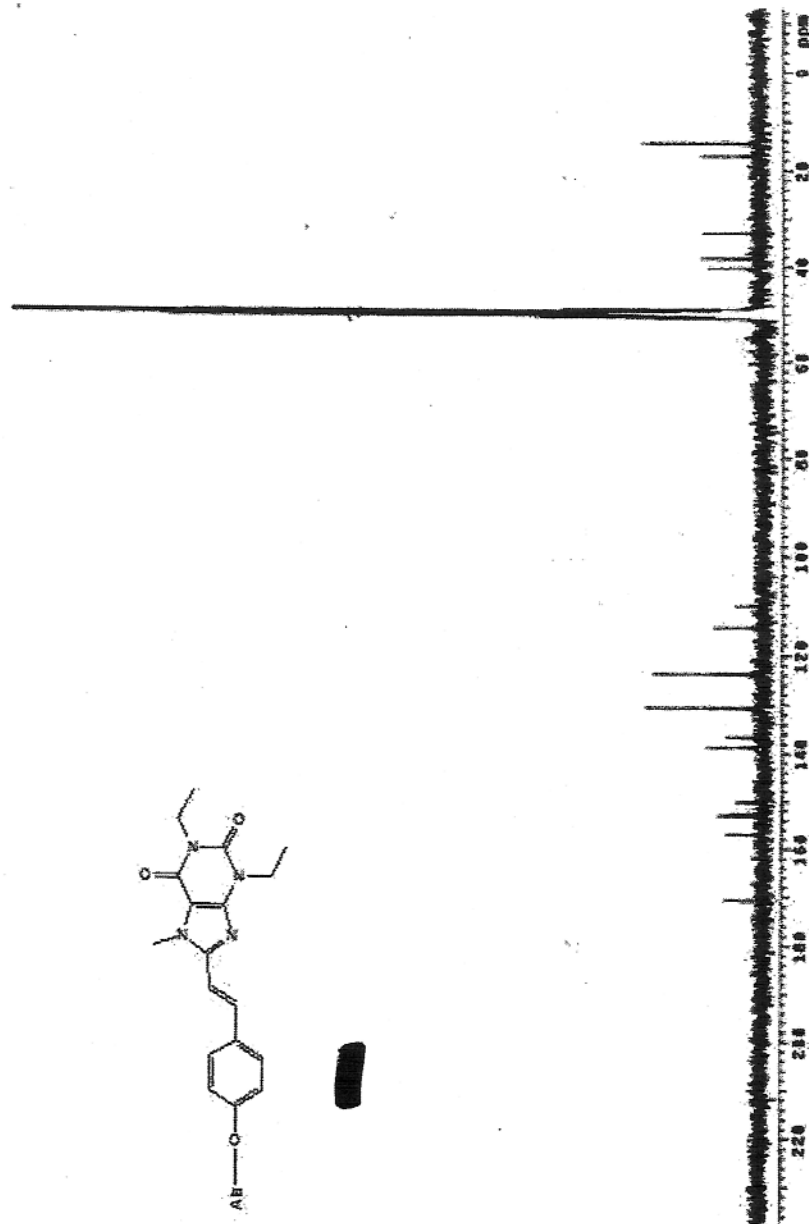



STANDARD PROTON PARAMETERS

Pulse Sequence: s2pu1  
Solvent: CDCl3  
Ambient temperature  
INOVA-500 "Water550"  
  
Pulse 45.0 degrees  
Acq. time 2.048 sec  
Width 3000.0 Hz  
84 repetitions  
OBSERVE H1, 499.7025705 MHz  
DATA PROCESSING  
F1 size 32768  
Total time 17 min, 8 sec

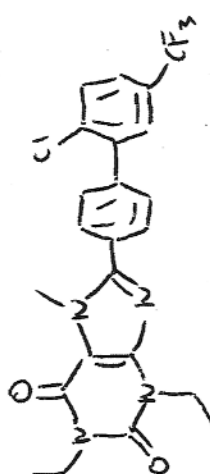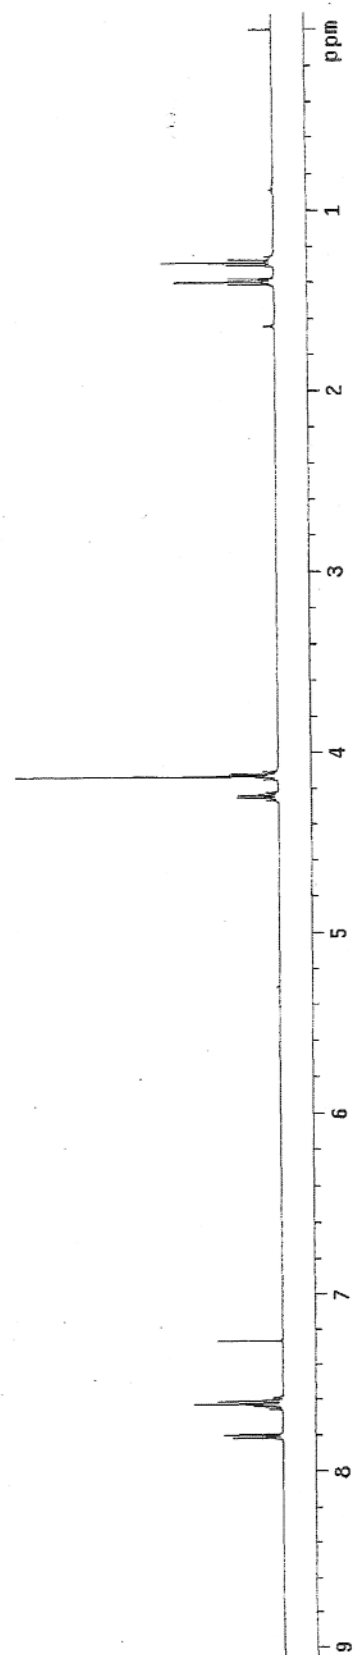

S58

STANDARD CARBON PARAMETERS dpwr=34, sv=34,000 Hz

Pulse Sequence: s2pul

Solvent: CDCl3

Ambient temperature

User: 1-14-87

INNOVA-500 "waters500"

Pulse 27.7 degrees

Acq. time 0.964 sec

Width 33999.2 Hz

4624 repetitions

OBSERVE C13, 125.6503998 MHz

DECOUPLE H1, 499.7059588 MHz

Power 34 dB

on during acquisition

off during delay

GARP-1 modulated

DATA PROCESSING

Line broadening 1.0 Hz

FT size 65536

Total time 5 hr, 24 min, 19 sec

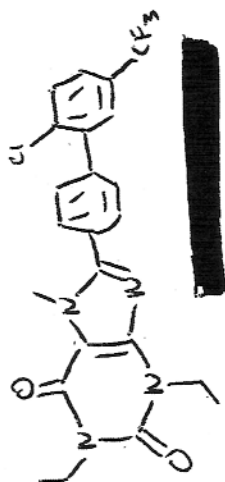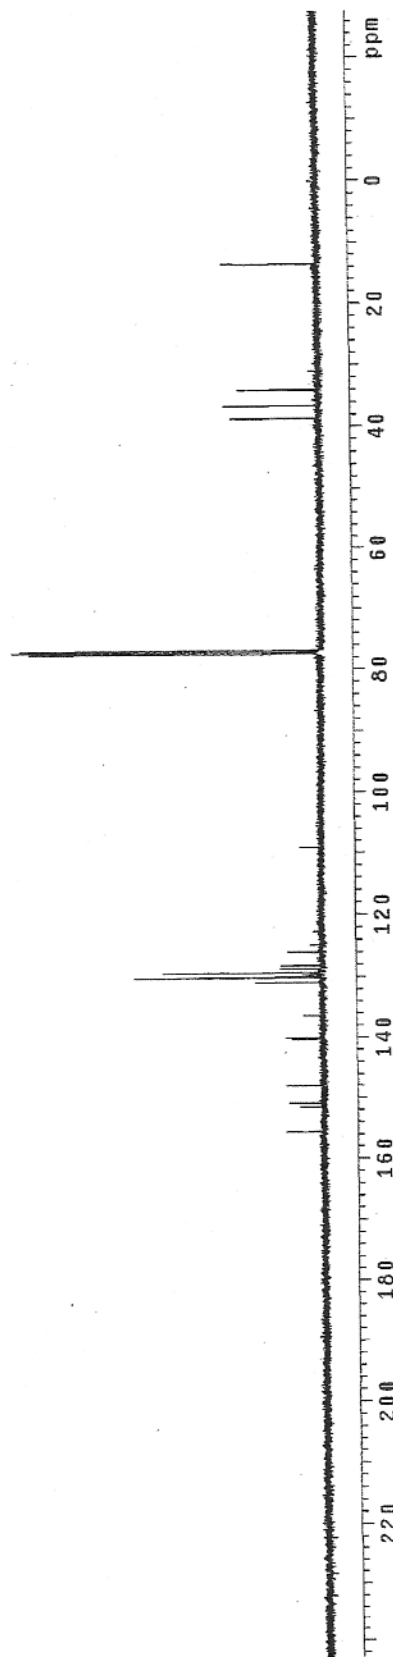

STANDARD CARBON PARAMETERS dpr-34, sw=34,000 Hz

Pulse Sequence: s2pu1

Solvent: CDCl3

Ambient temperature

User: i-14-87

INNOVA-500 "waters500"

Pulse 27.7 degrees

Acq time 0.984 sec

Width 3399.2 Hz

45286 repetitions

OBSERVE C13, 125.6503793 MHz

DECOUPLE H1, 499.7059588 MHz

Power 34 dB

on during acquisition

off during delay

GARP-1 modulated

DATA PROCESSING

Line broadening 2.0 Hz

FT size 65536

Total time 27 hr, 1 min, 9 sec

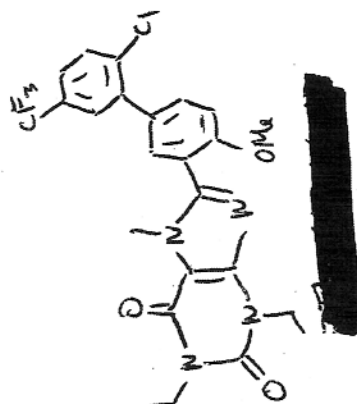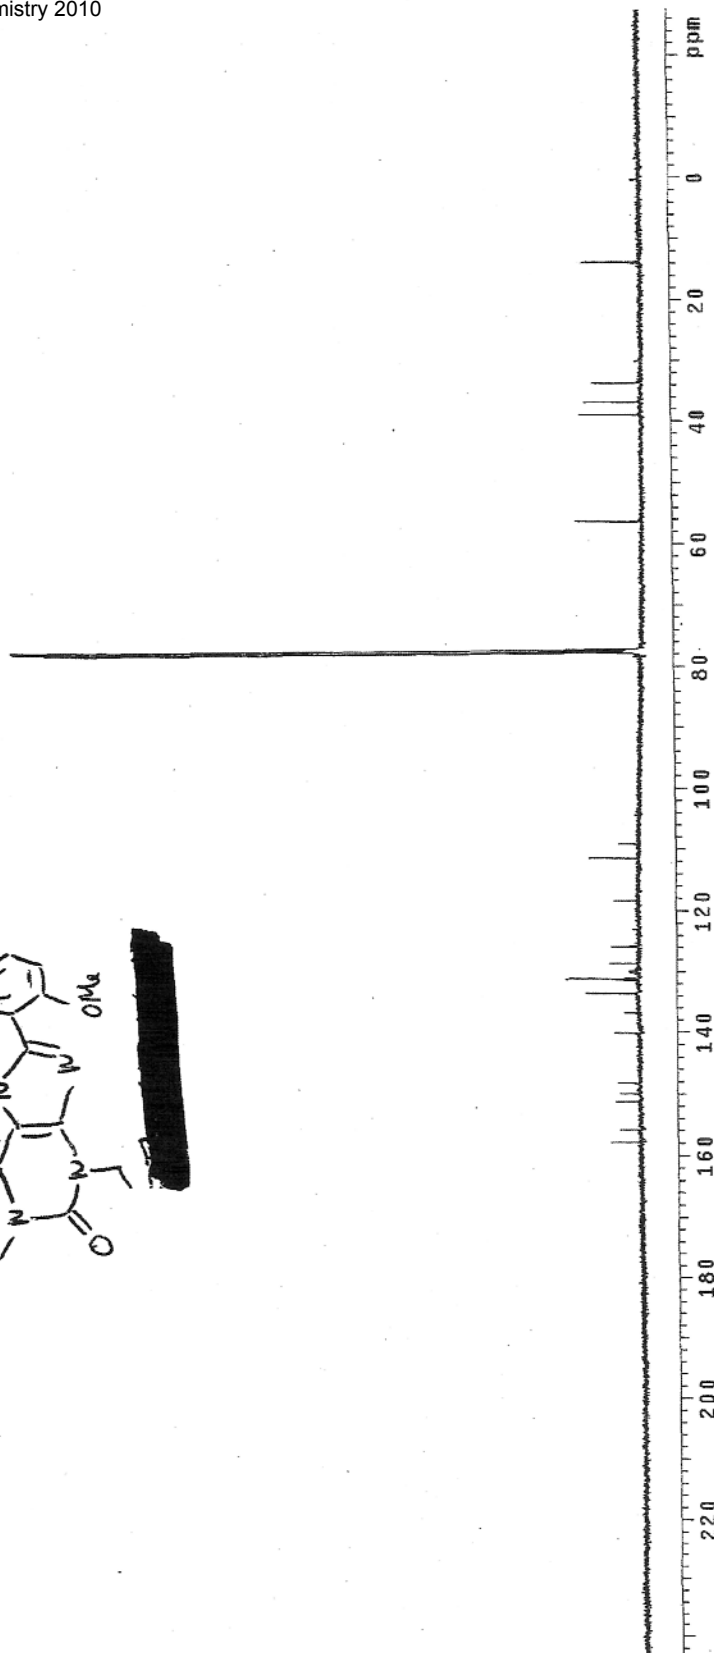

S60

# STANDARD PROTON PARAMETERS

Pulse Sequence: s2pul

Solvent: CDCl<sub>3</sub>

Ambient temperature

INOVA-500 "waters500"

Relax. delay 15.000 sec

Pulse 45.0 degrees

Acq. time 2.048 sec

Width 8000.0 Hz

6 repetitions

OBSERVE H1, 499.7029719 MHz

DATA PROCESSING

Line broadening 0.1 Hz

FT size 32768

Total time 2 hr, 22 min, 8 sec

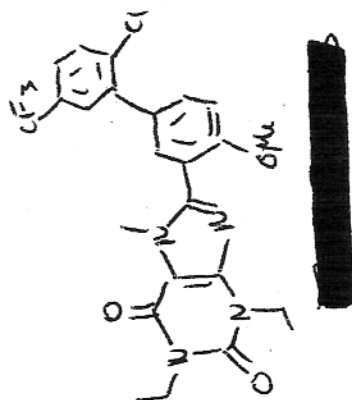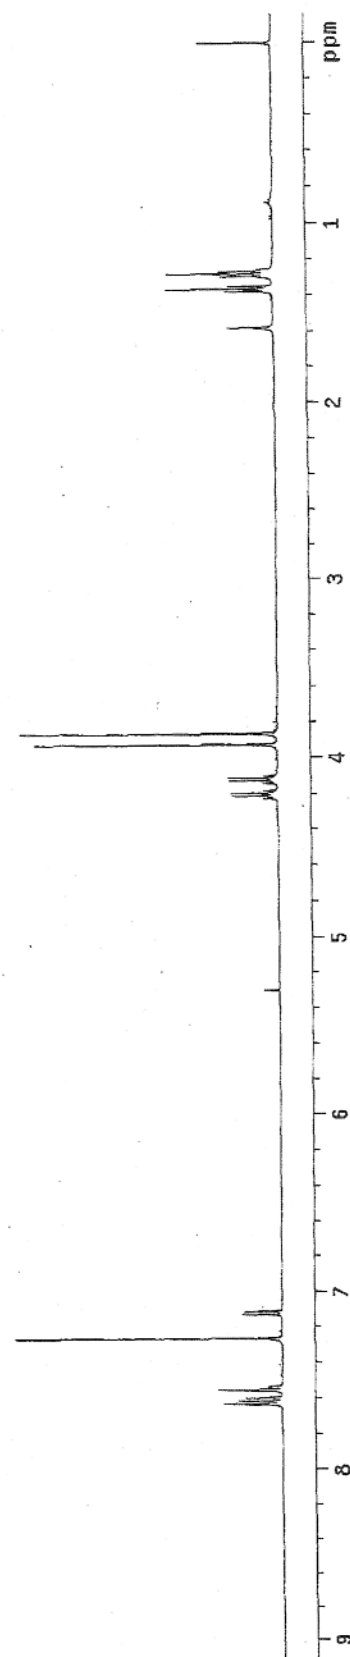

S61

STANDARD CARBON PARAMETERS dpwr=34, sw=34,000 Hz

Pulse Sequence: s2pu1

Solvent: CDC13

Ambient temperature

User: 1-14-87

INNOVA-500 "waters500"

Pulse 27.7 degrees

Acq. time 0.964 sec

Width 33899.2 Hz

1472 repetitions

OBSERVE C13, 125.6504095 MHz

DECOUPLE H1, 499.7058568 MHz

Power 34 dB

on during acquisition

off during delay

GARP-1 modulated

DATA PROCESSING

Line broadening 1.0 Hz

FT size 65536

Total time 2 hr, 42 min, 6 sec

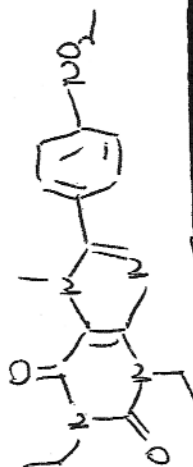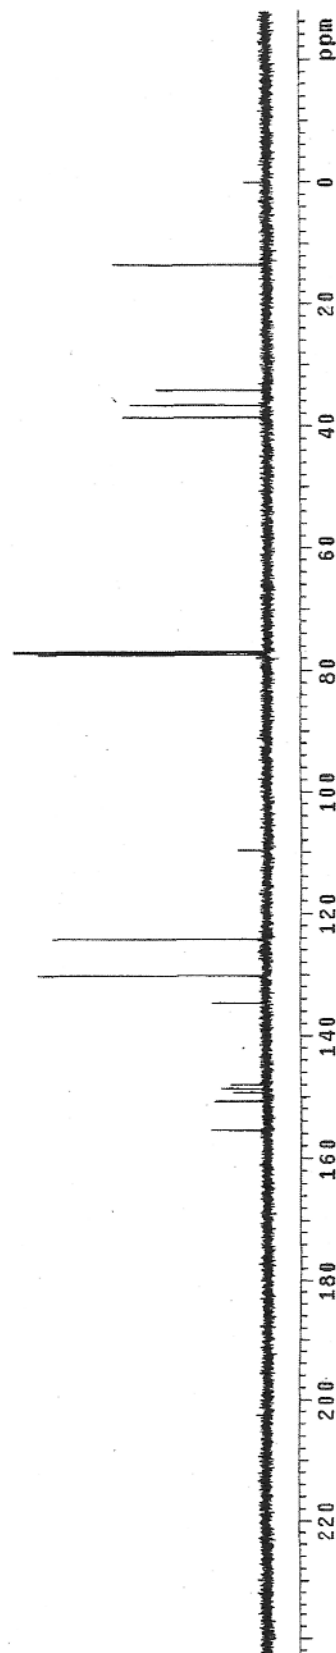

S62

STANDARD PROTON PARAMETERS

Pulse Sequence: s2pul  
Solvent: CDCl3  
Ambient temperature  
INOVA-500 "waters500"  
Pulse 45.0 degrees  
Acq. time 2.048 sec  
Width 8000.0 Hz  
82 repetitions  
OBSERVE H1, 499.7023646 MHz  
DATA PROCESSING  
FT size 32768  
Total time 17 min, 8 sec

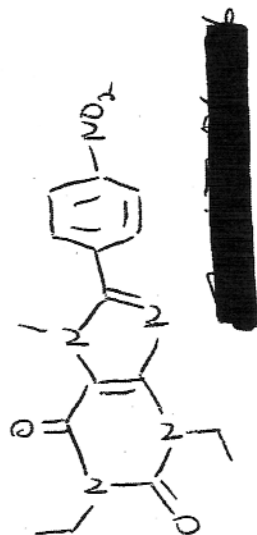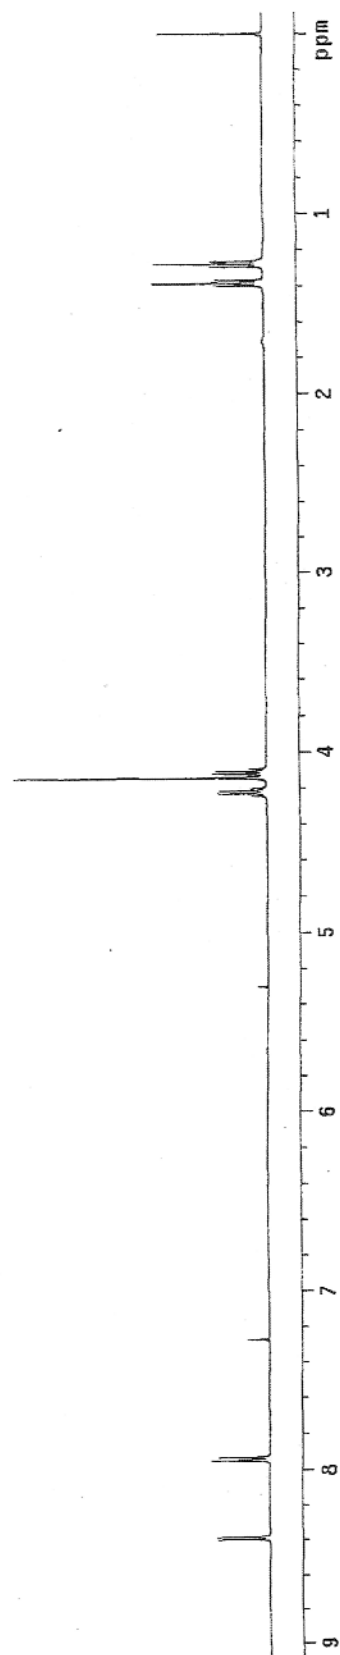

Supplement: c003382k.pdf [file c003382k.pdf]
